# Supplementary material for: Combined assessment of S‐ and N‐specific IL‐2 and IL‐13 secretion and CD69 neo‐expression for discrimination of post–infection and post‐vaccination cellular SARS‐CoV‐2‐specific immune response
Source: PubMed Central journal article supplement — Allergy. 2022 Jul 19:10.1111/all.15406. Online ahead of print. doi: 10.1111/all.15406 (PMC9348018; doi:10.1111/all.15406), 2022-07-19

# Figure S1

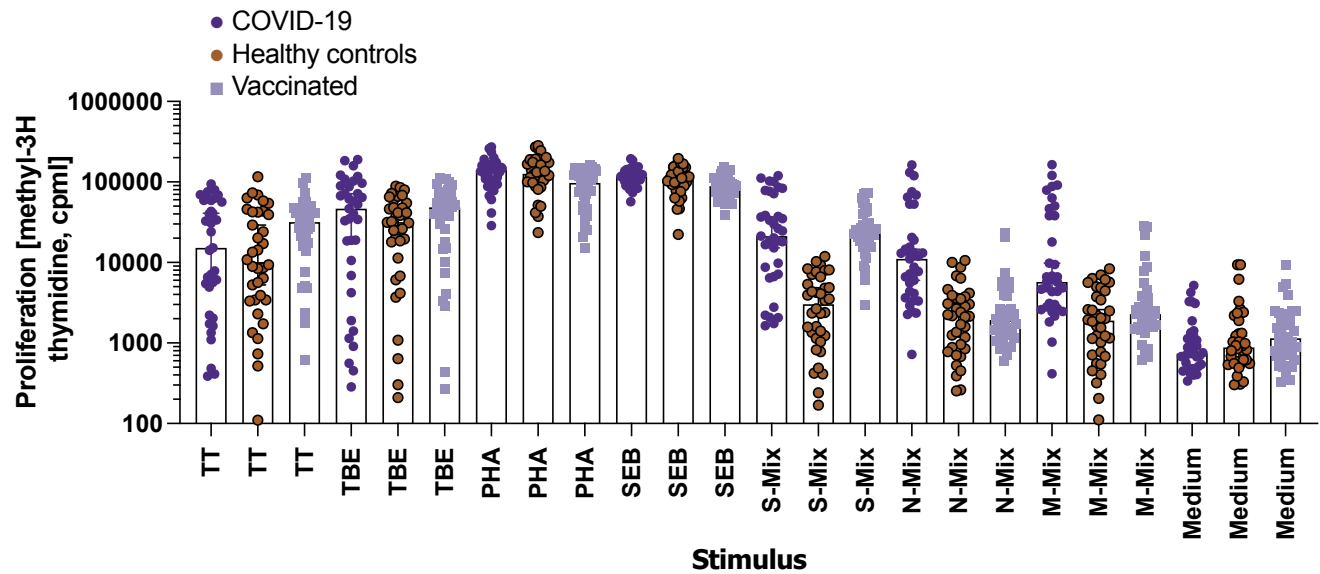

# Figure S2

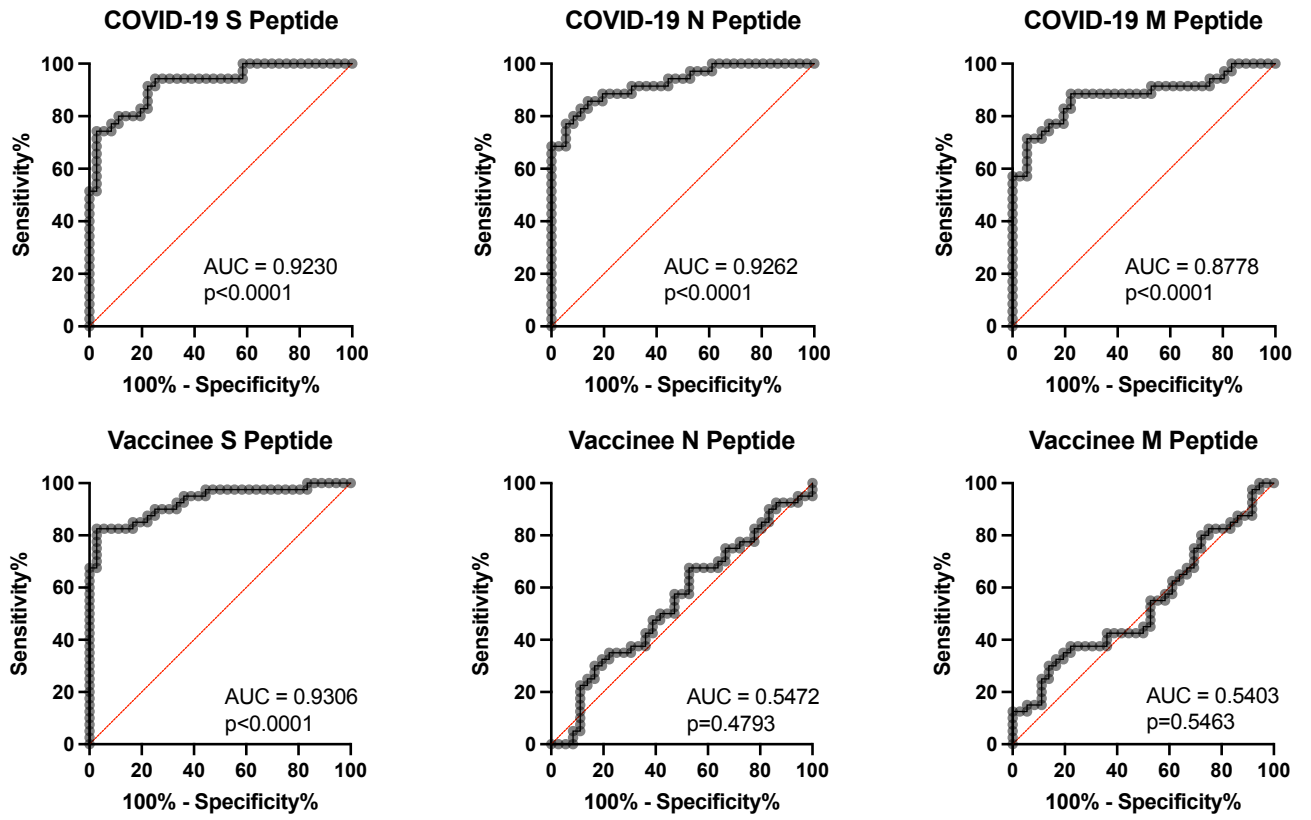

# Figure S3A

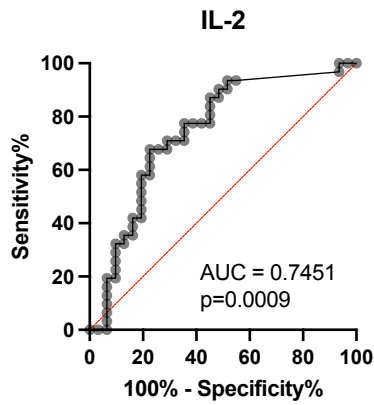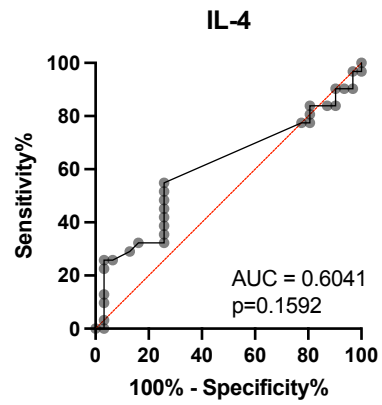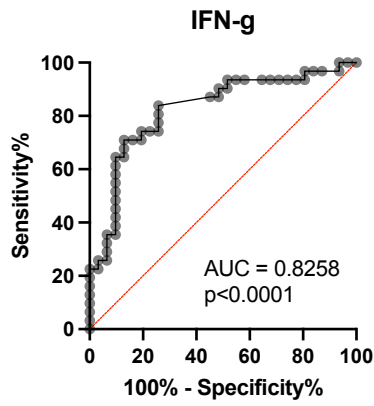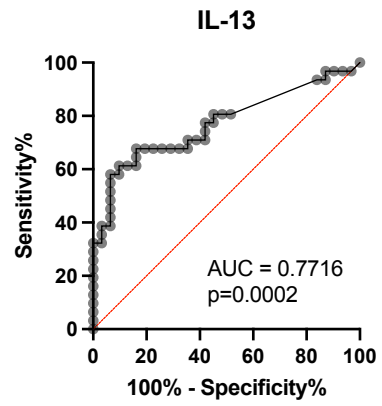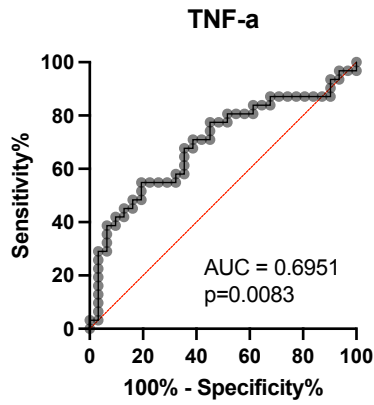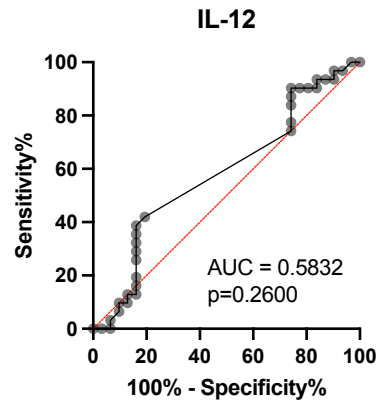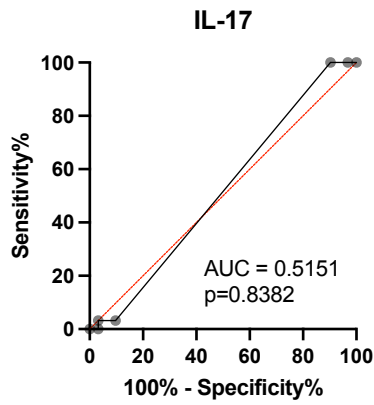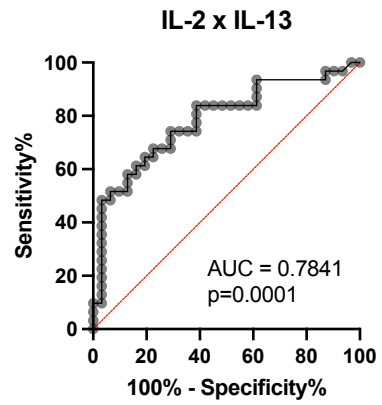

# Figure S3B

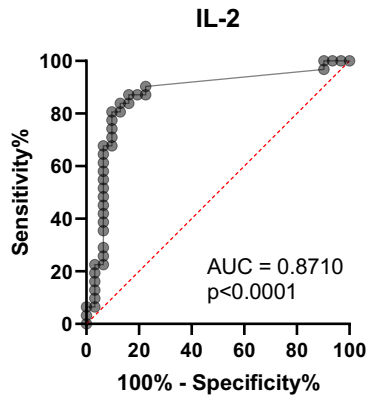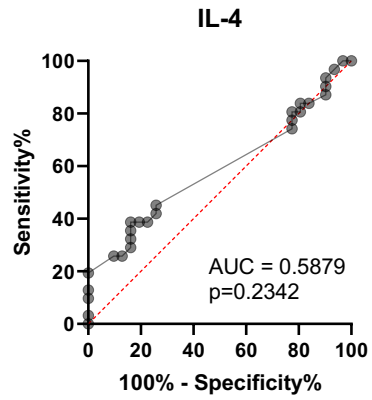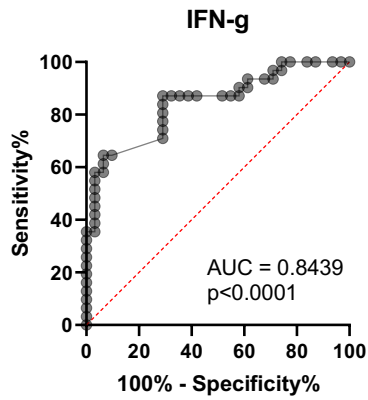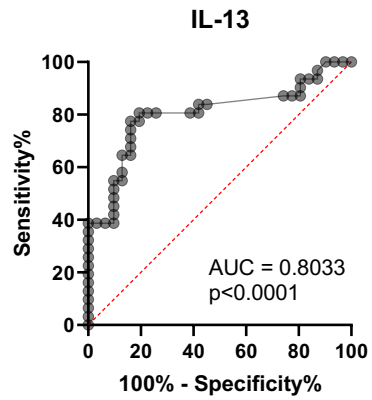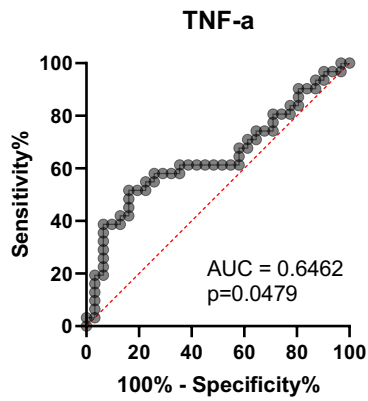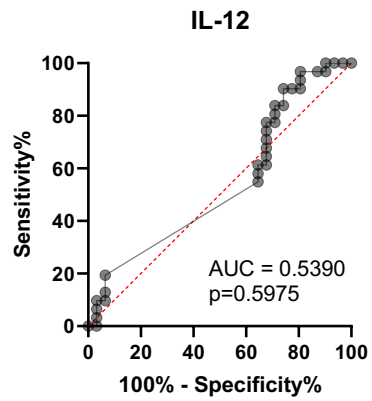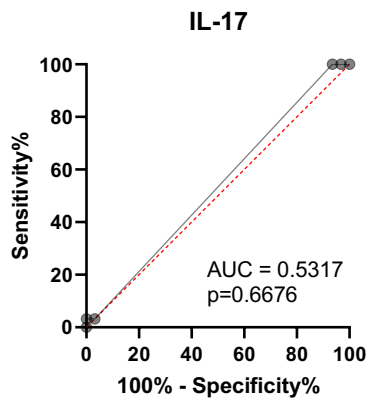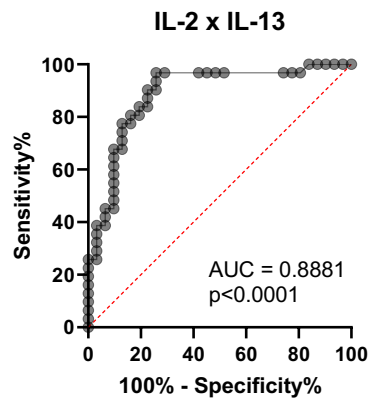

# Figure S3C

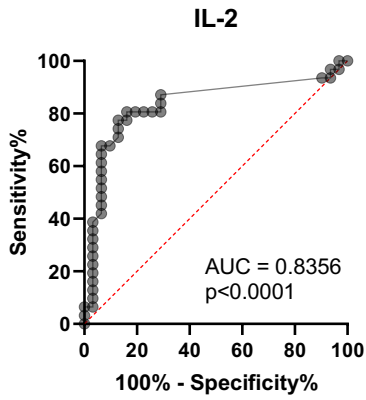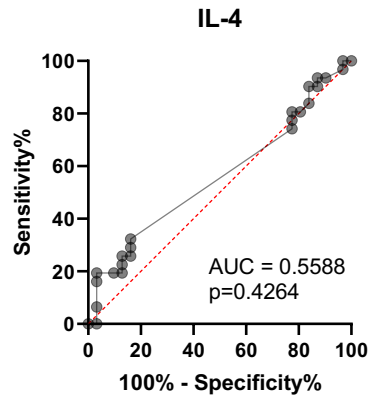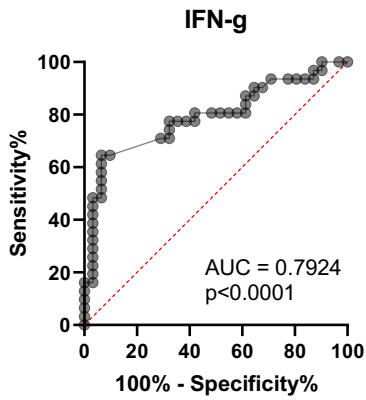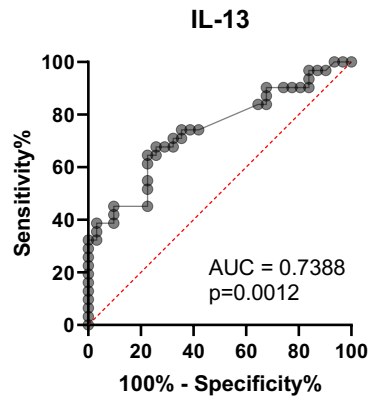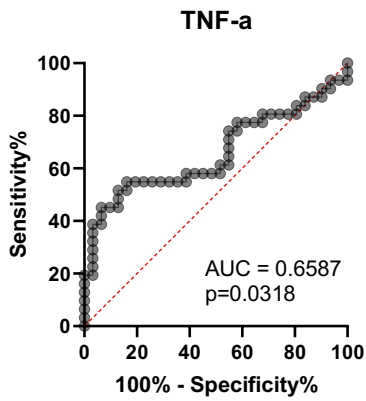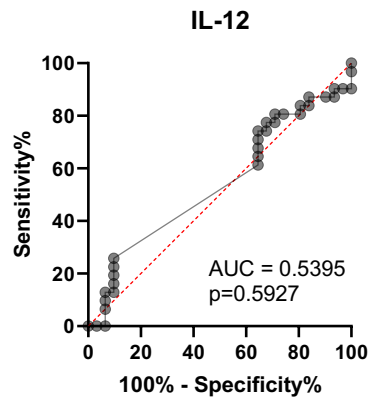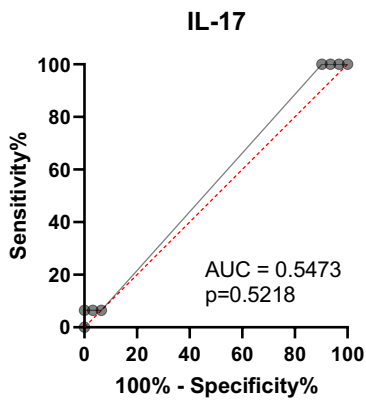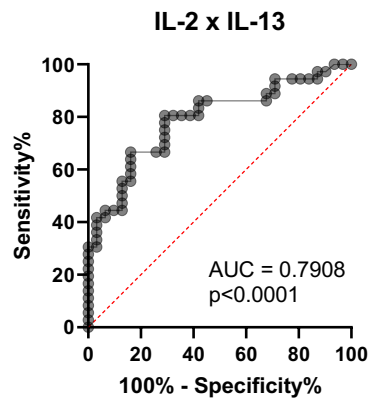

# Figure S4A

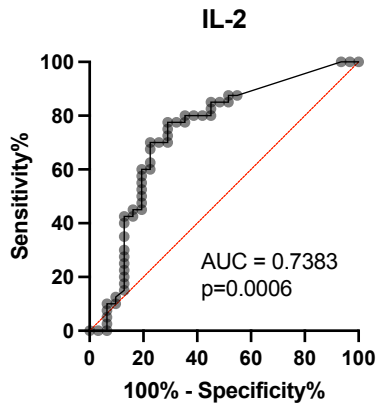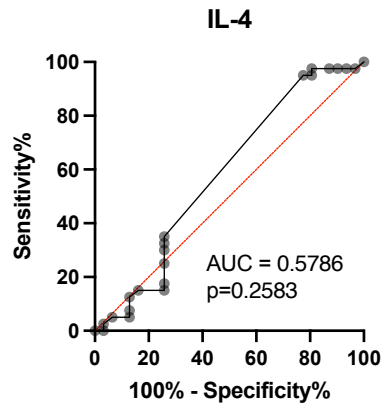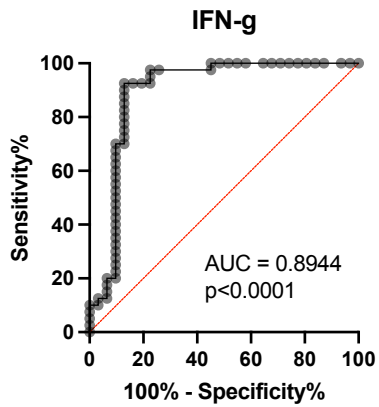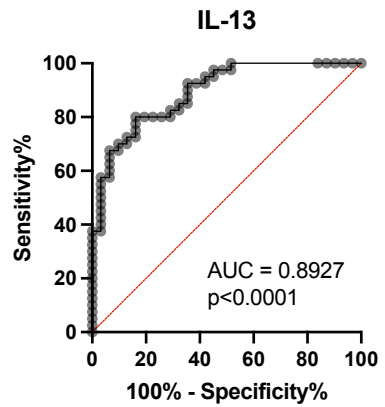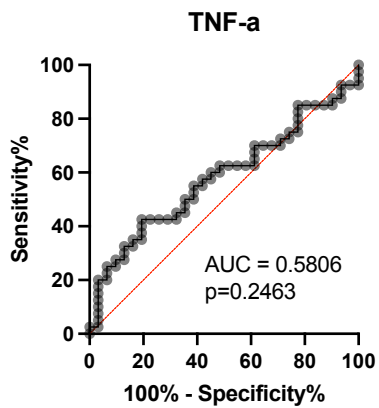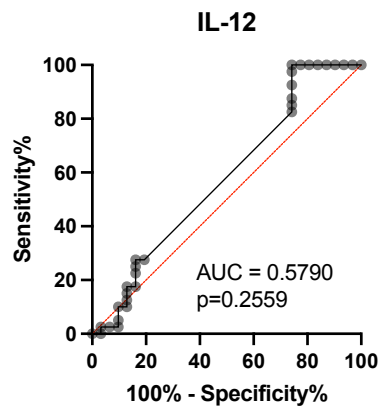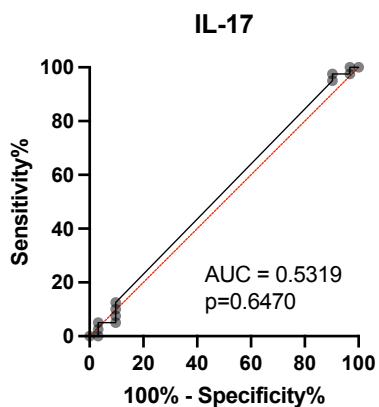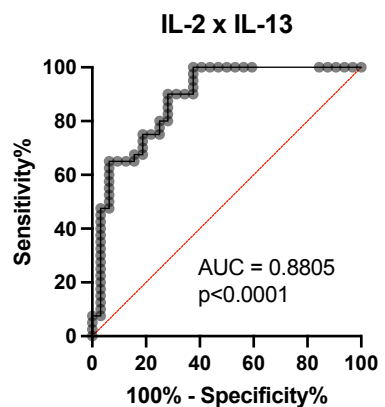

# Figure S4B

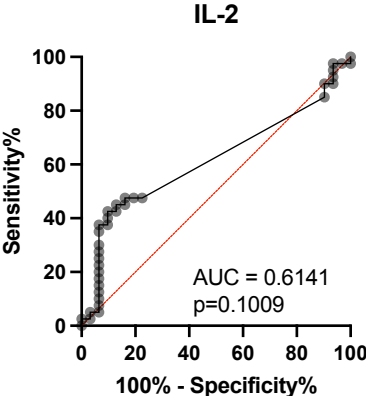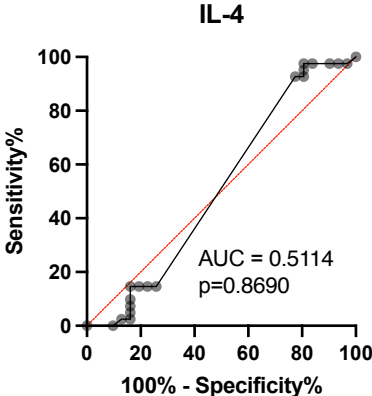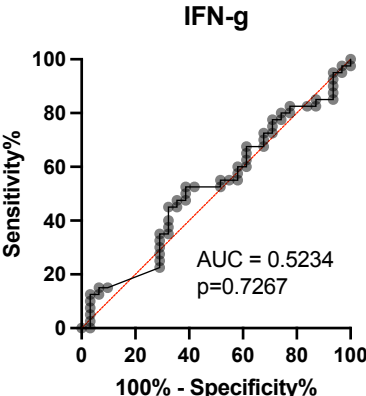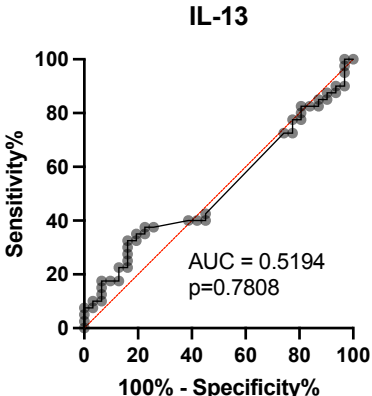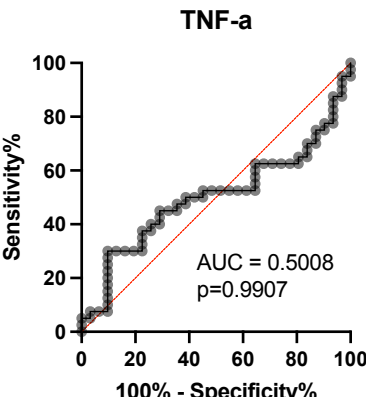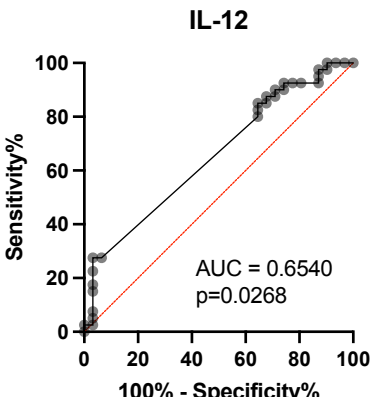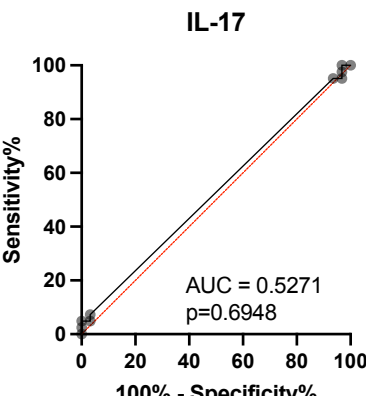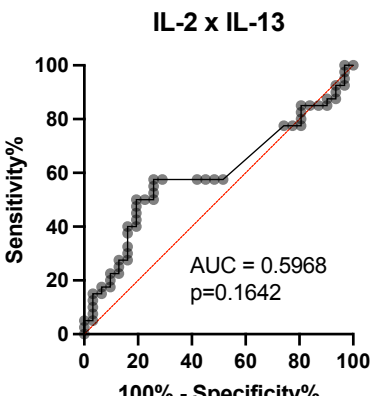

# Figure S4C

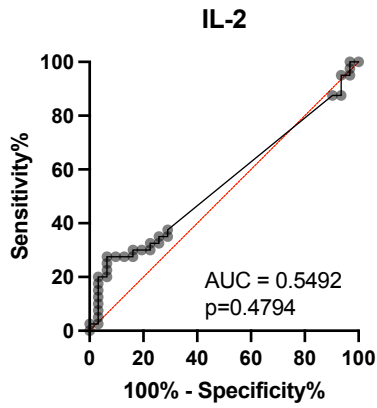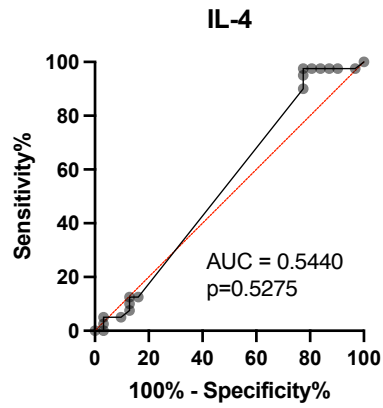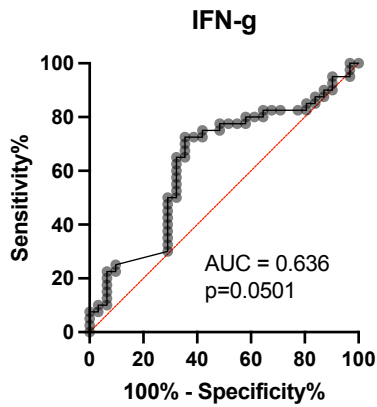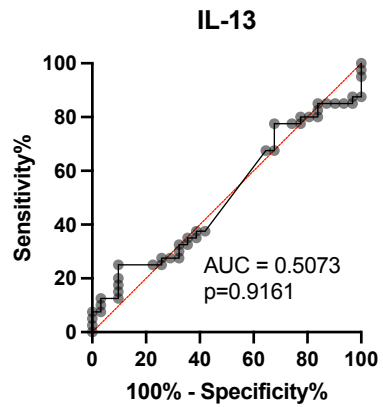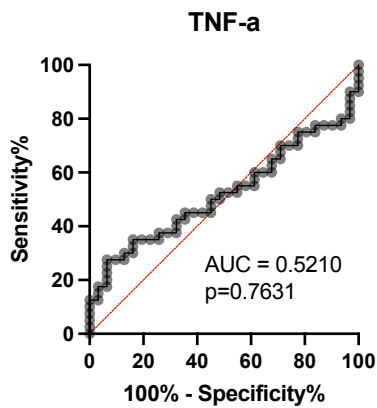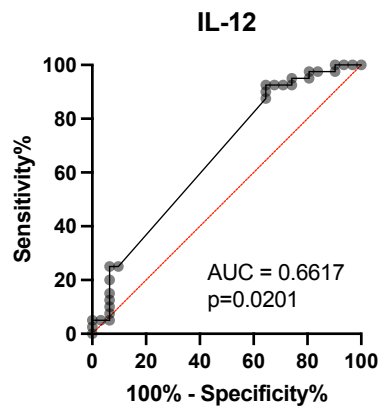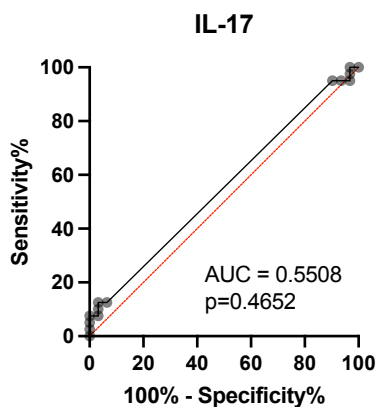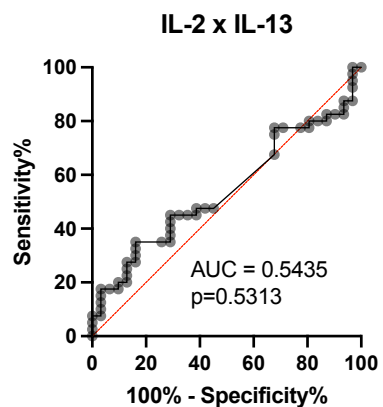



# Figure S5

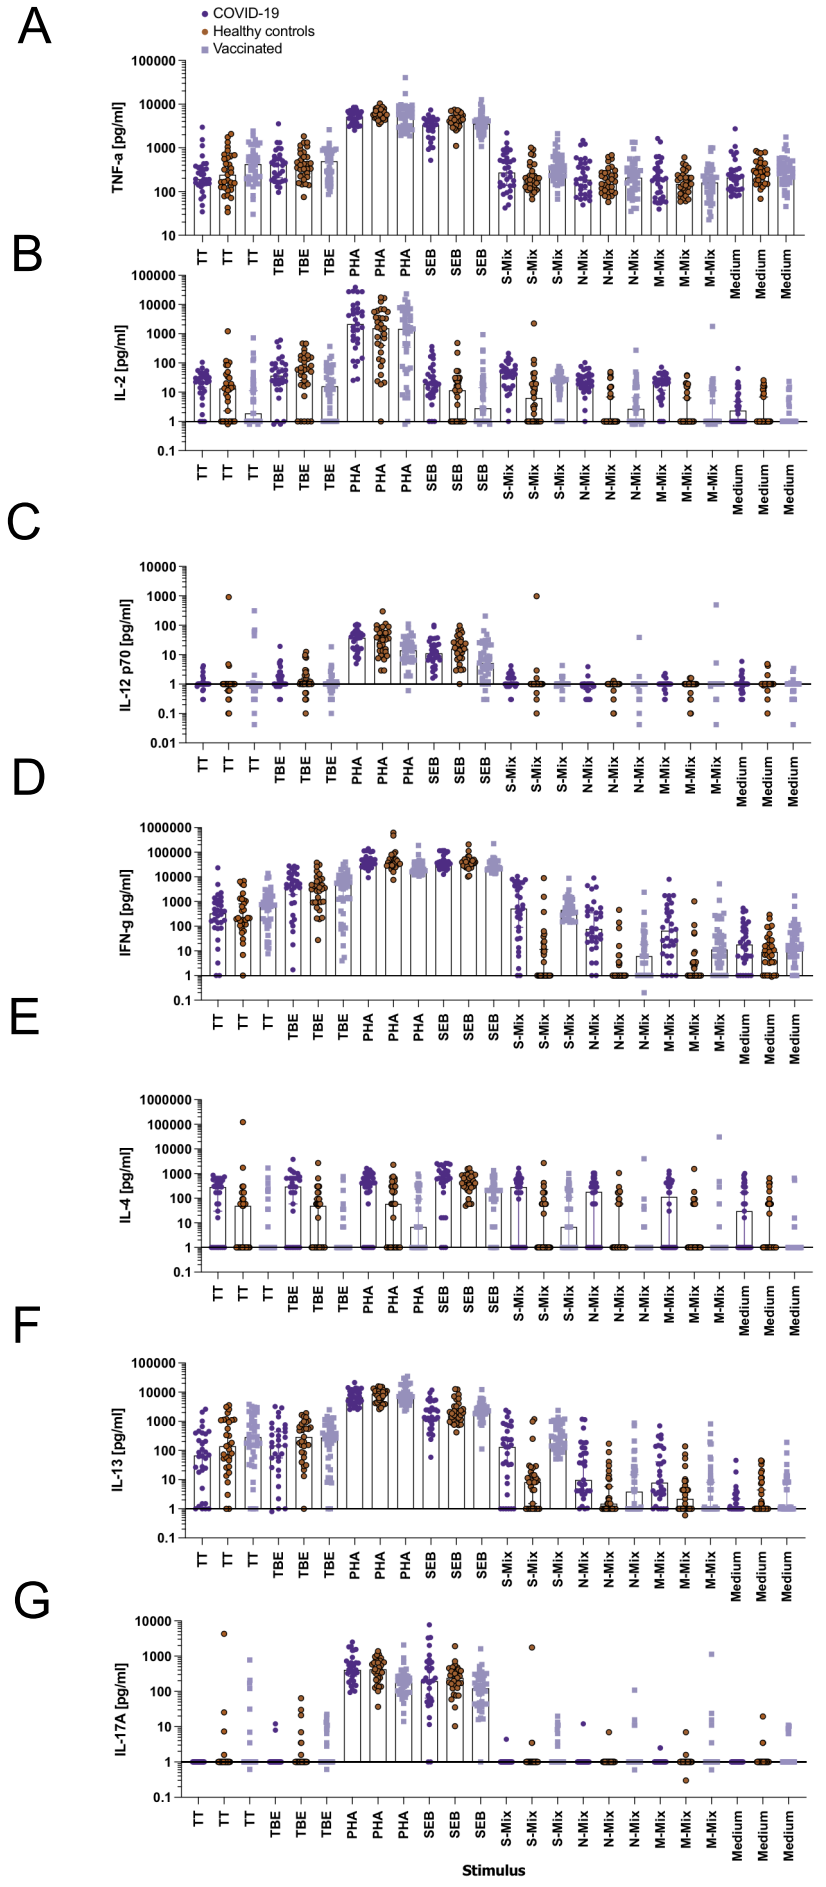

# Figure S6A

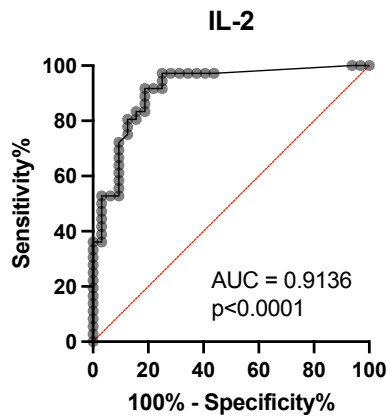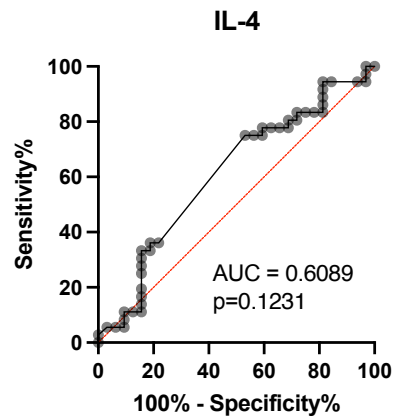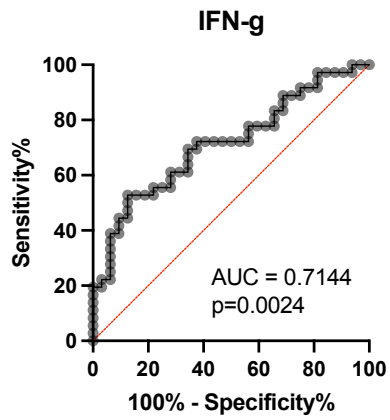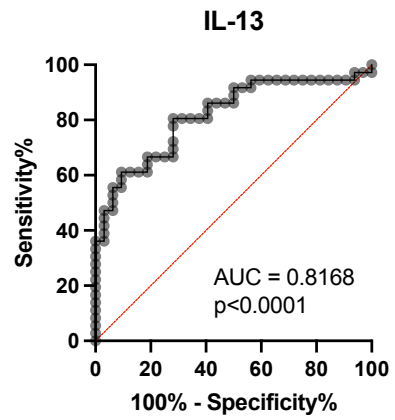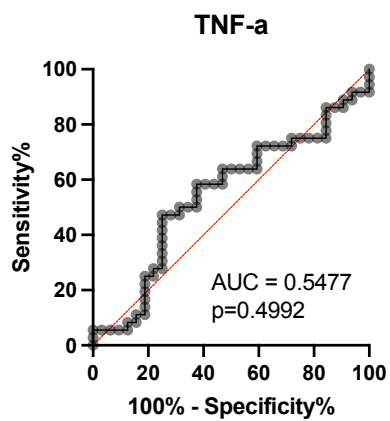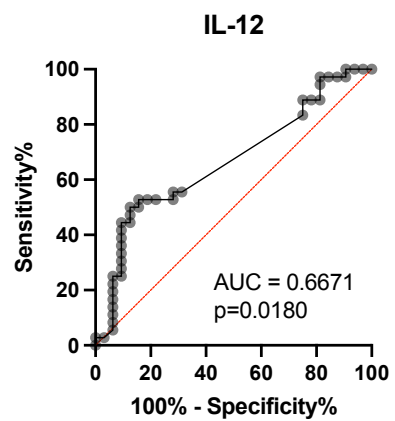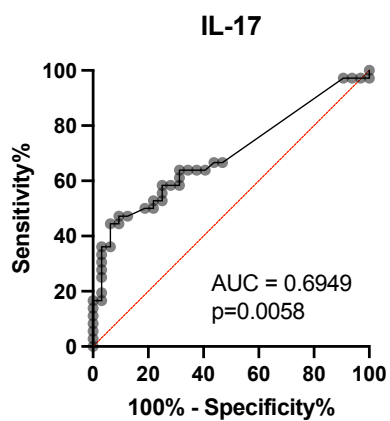

# Figure S6B

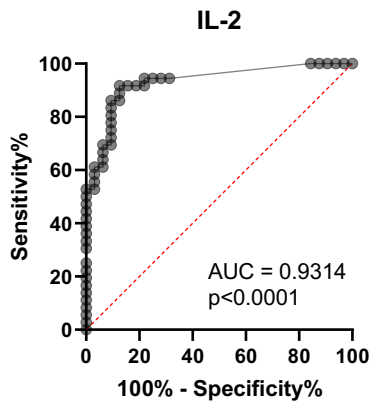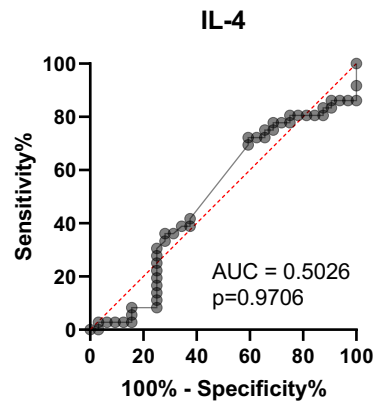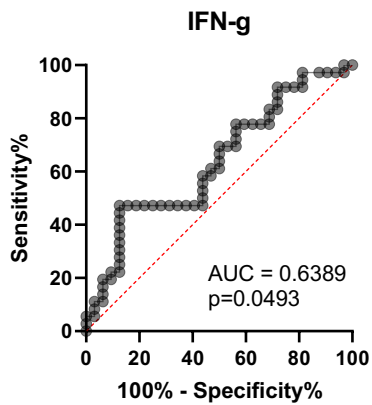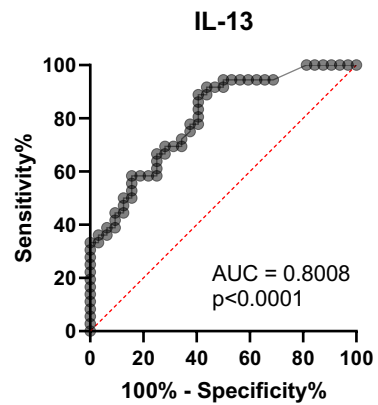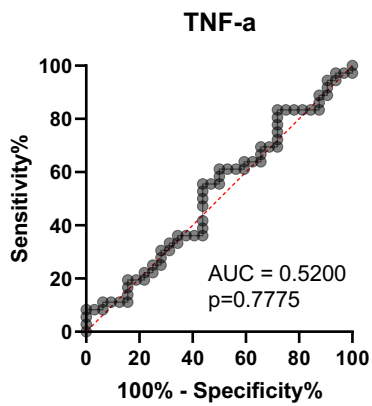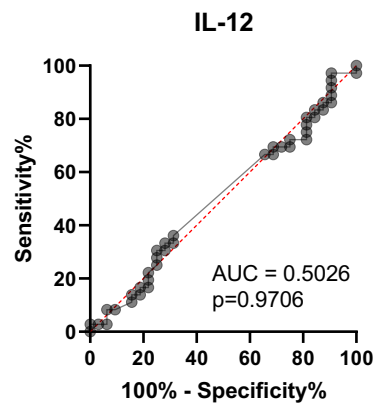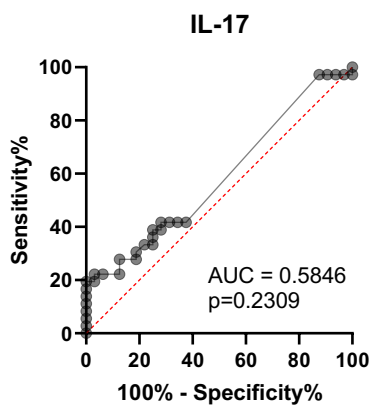

# Figure S6C

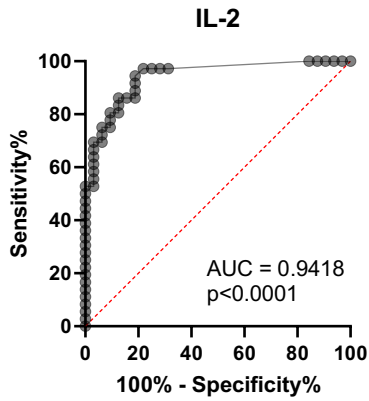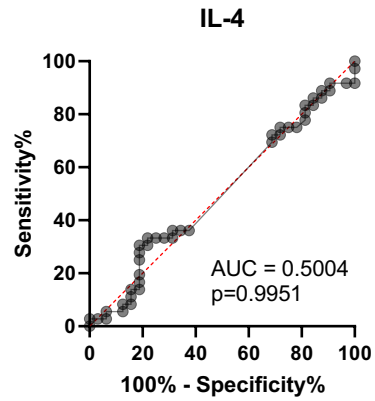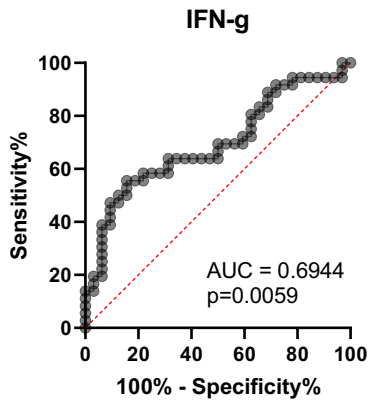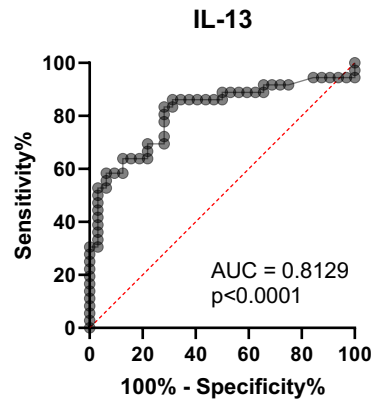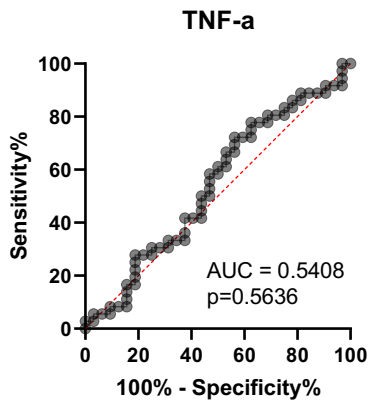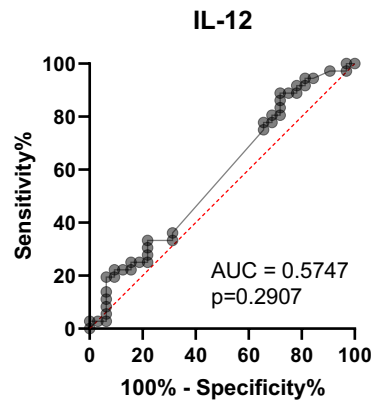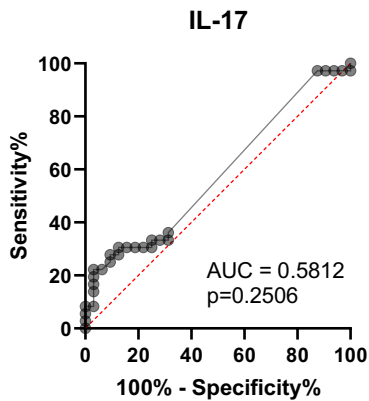

# Figure S6D

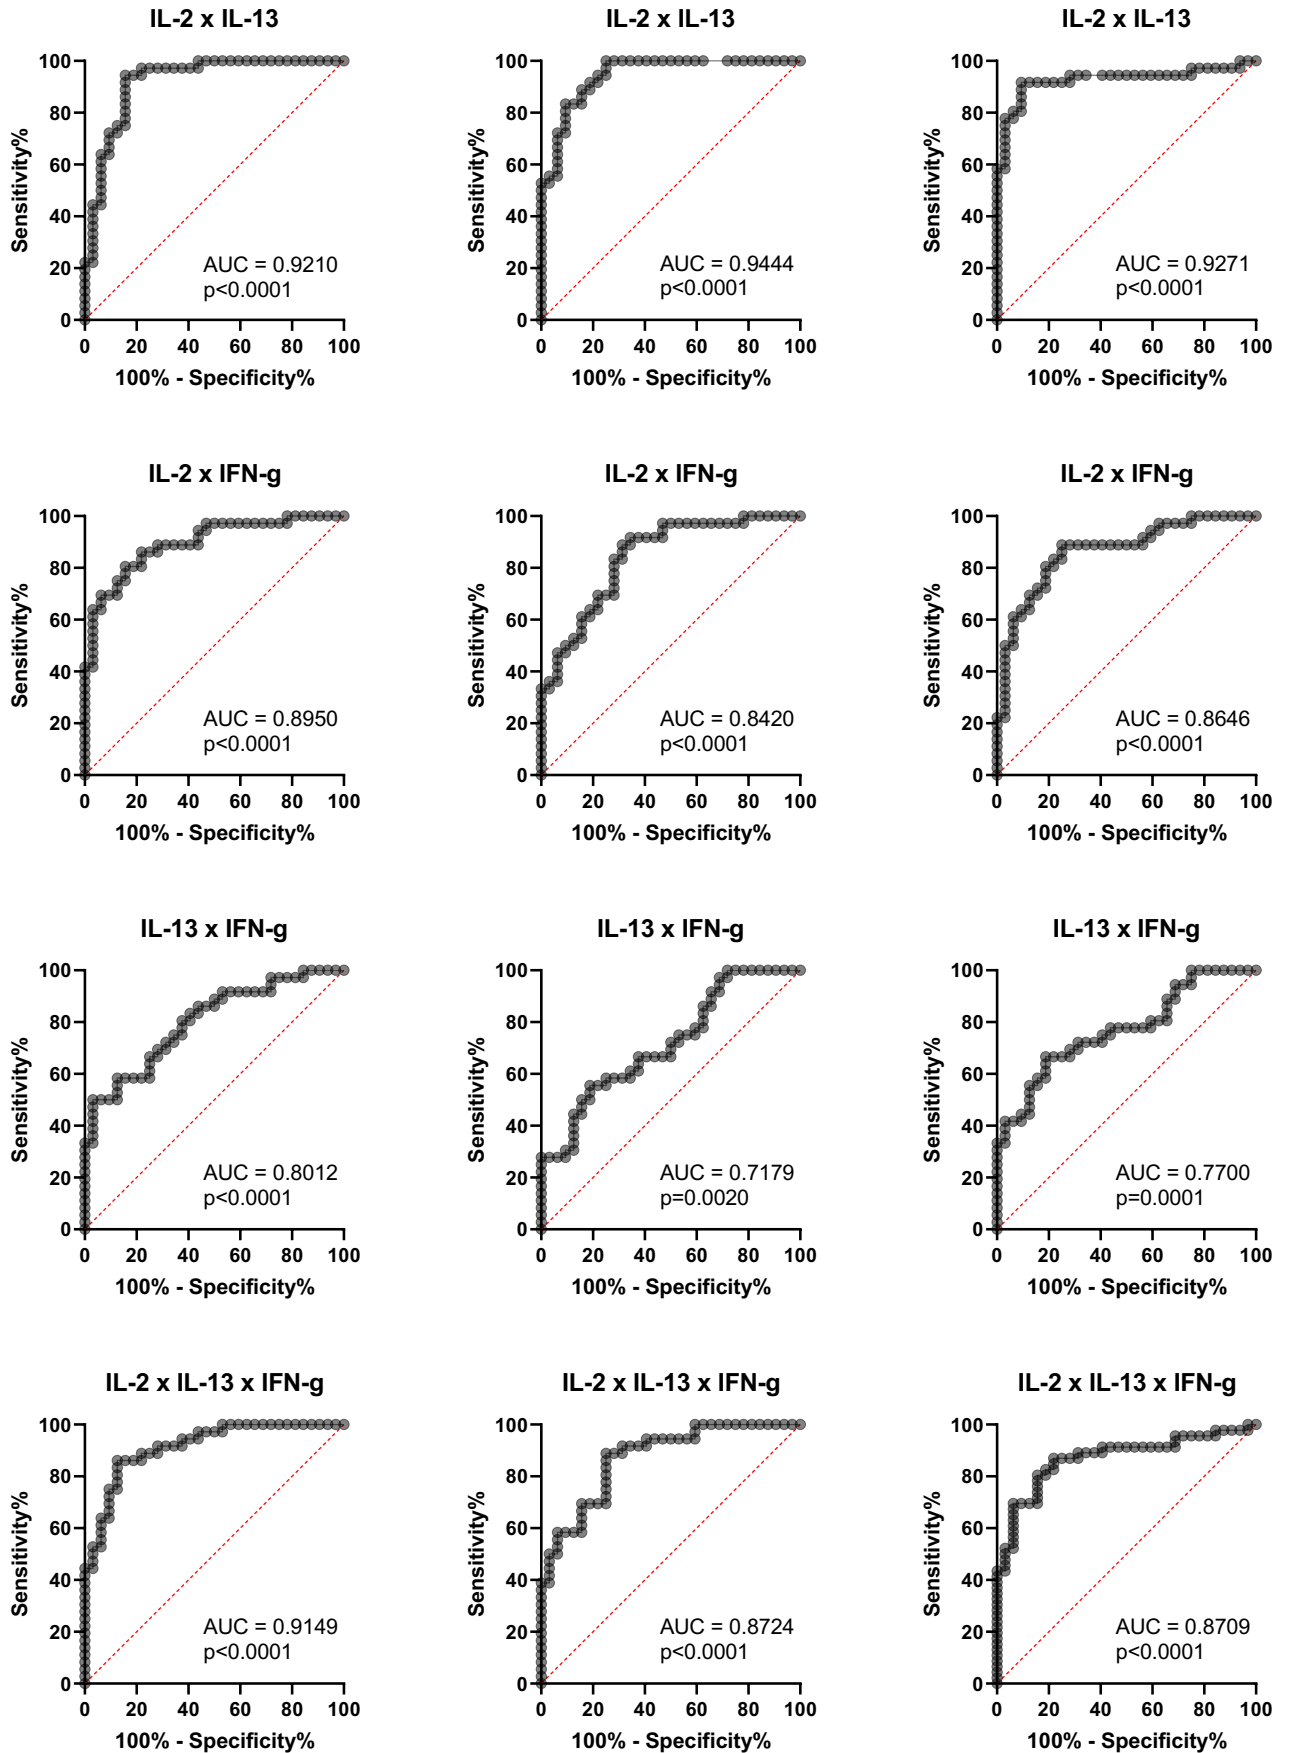

# Figure S7A

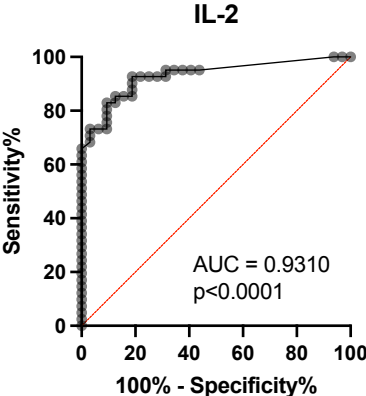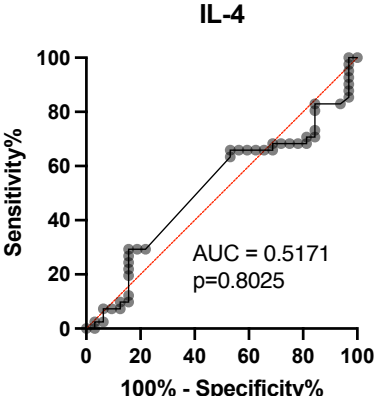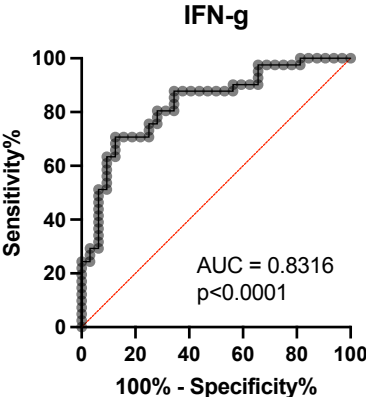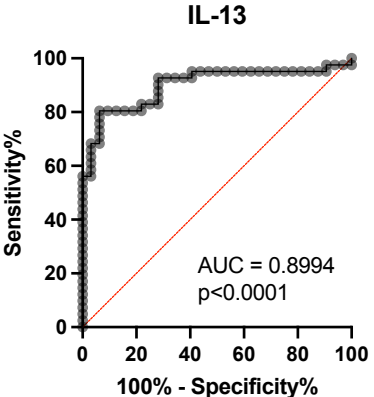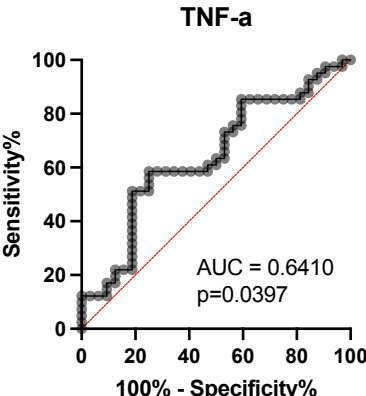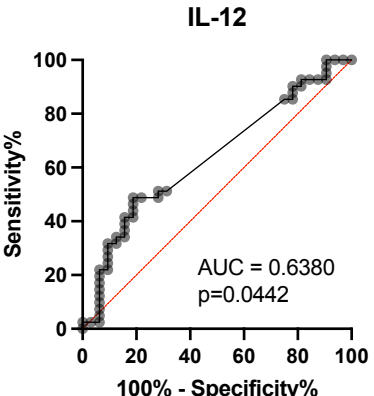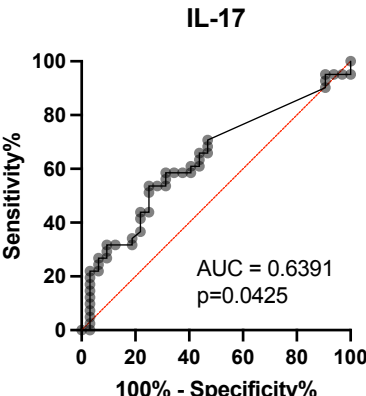

# Figure S7B

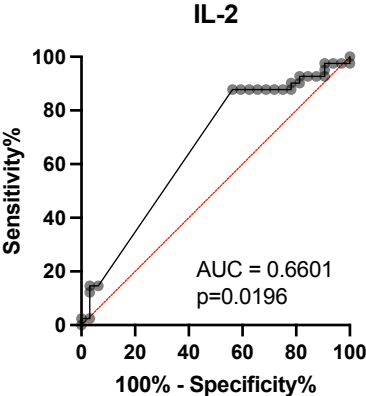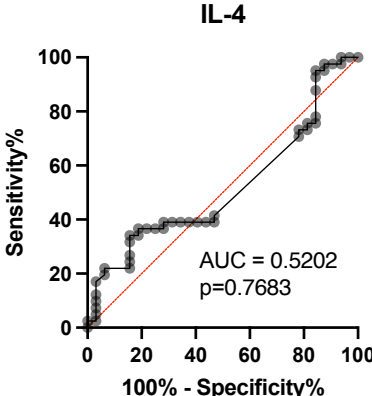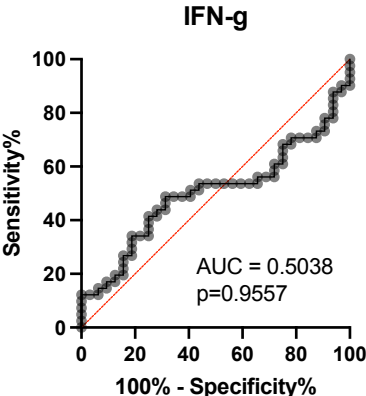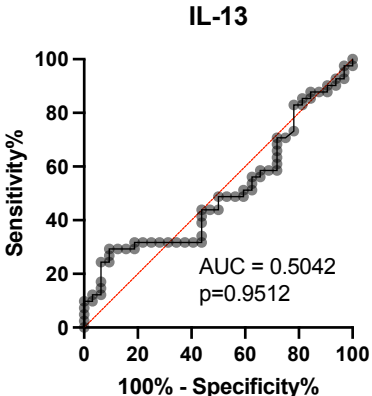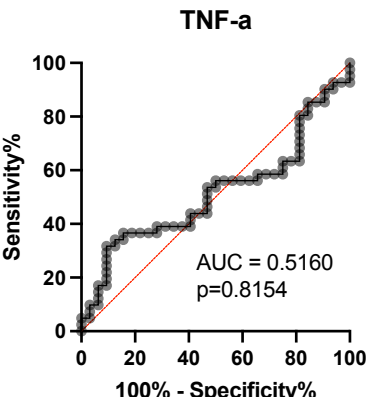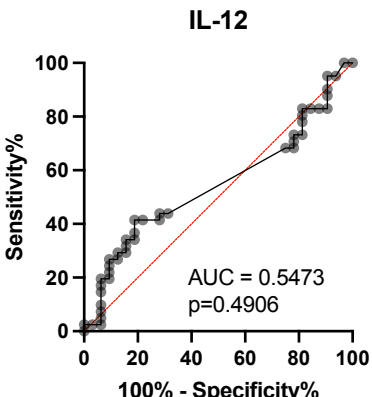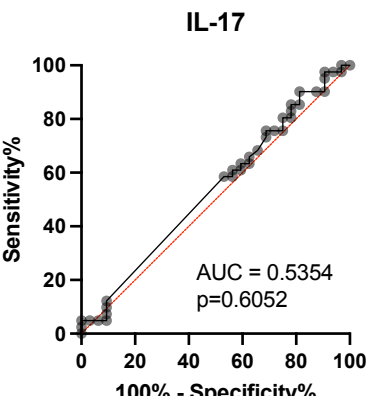

# Figure S7C

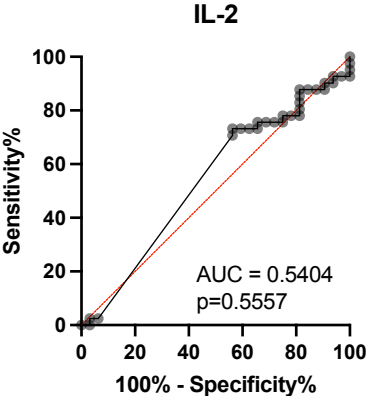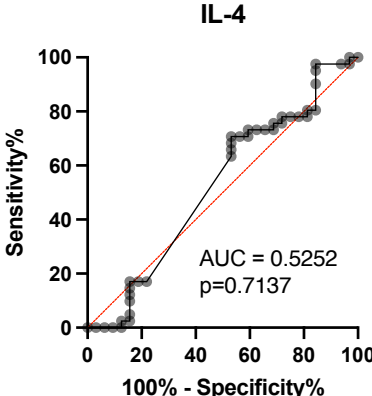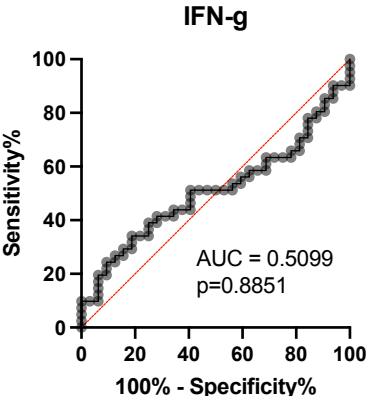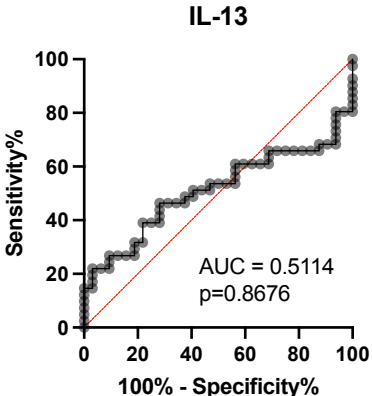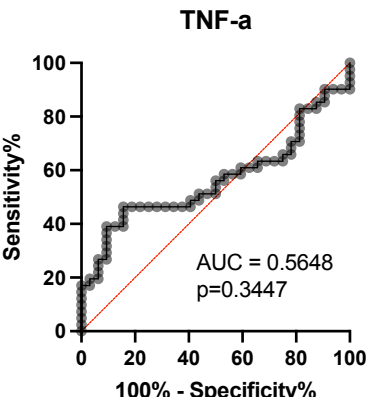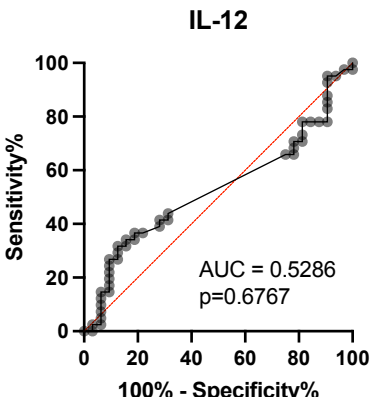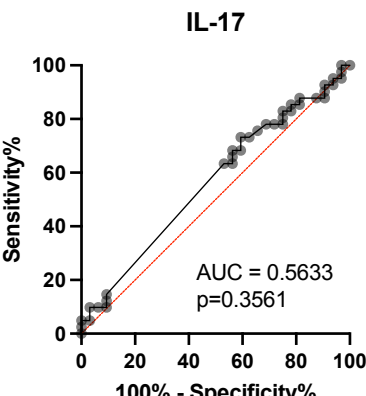



# Figure S7D

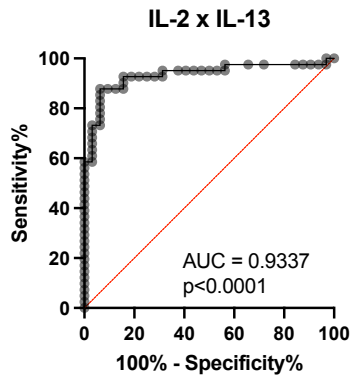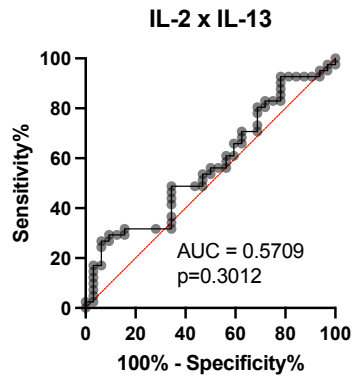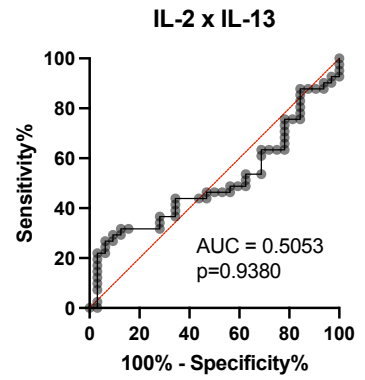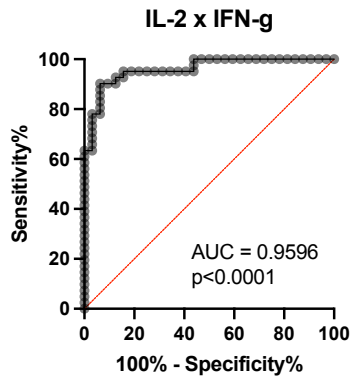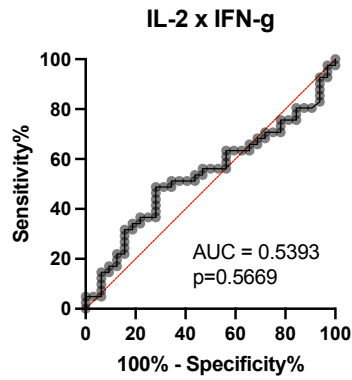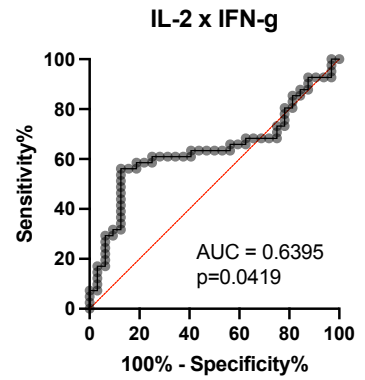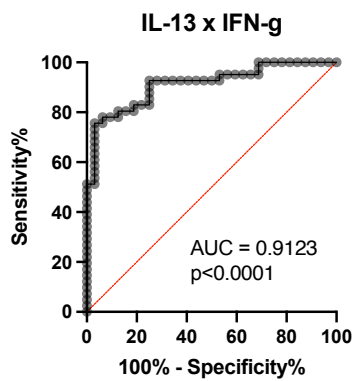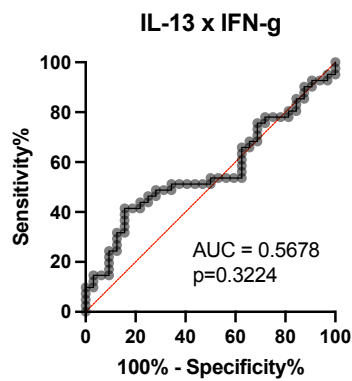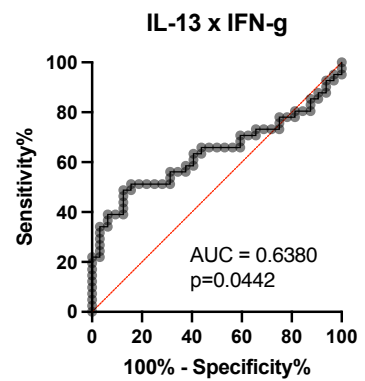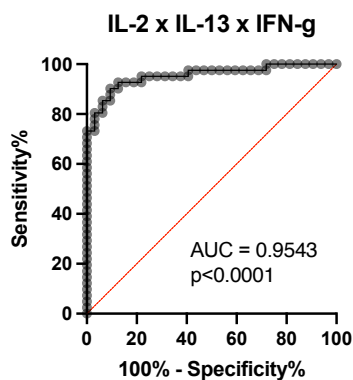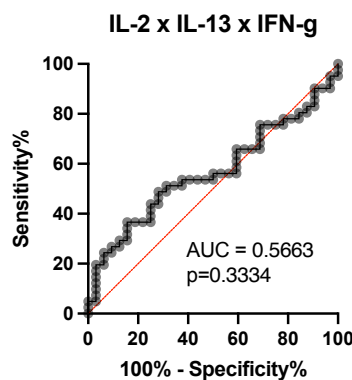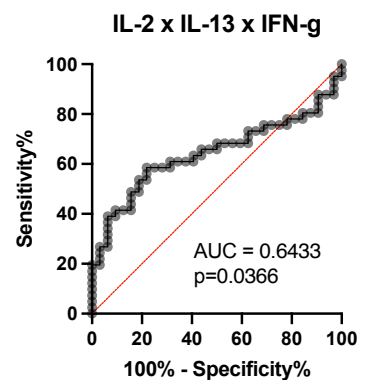

# Figure S8

A

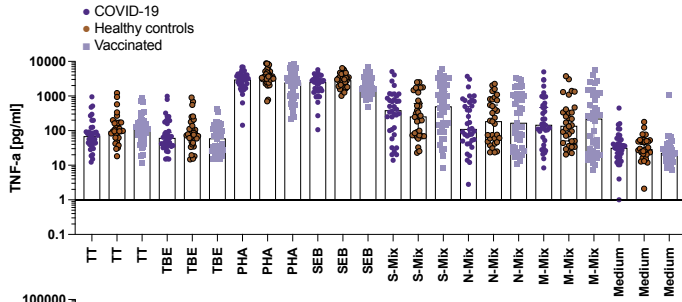

B

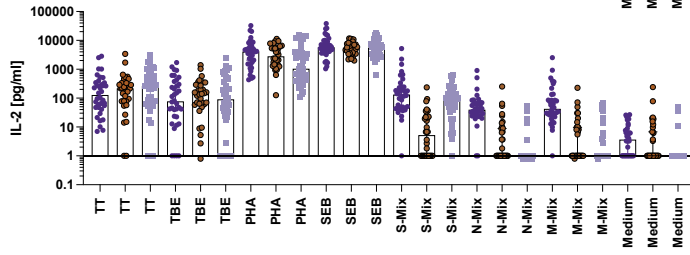

C

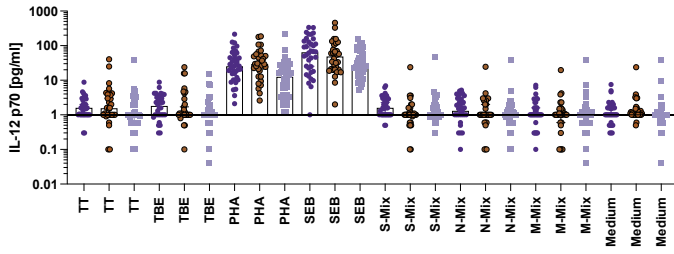

D

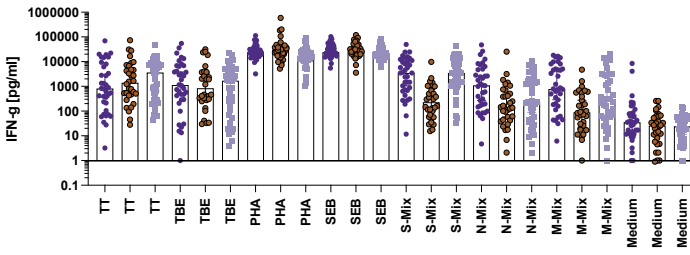

E

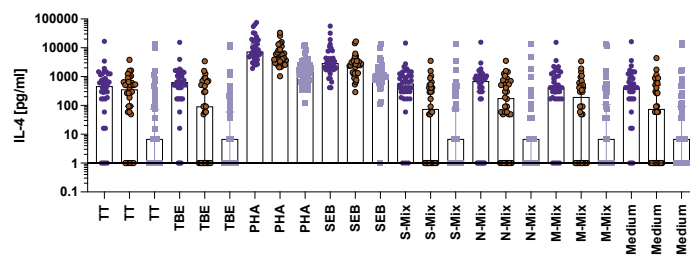

F

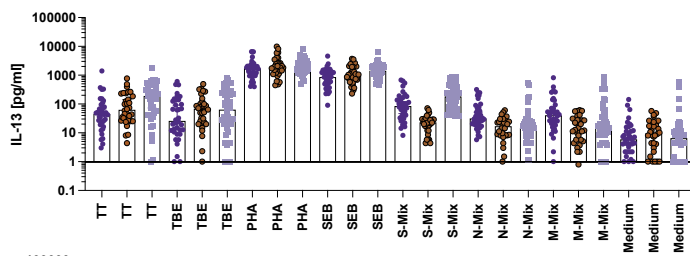

G

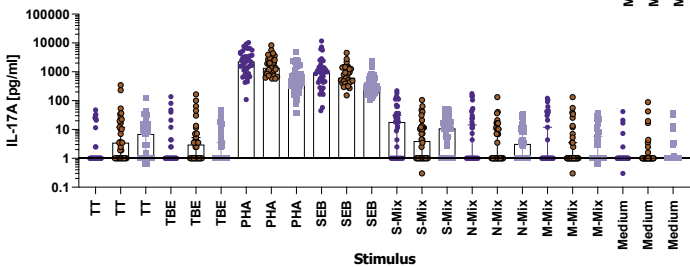

Stimulus

# Figure S9

A

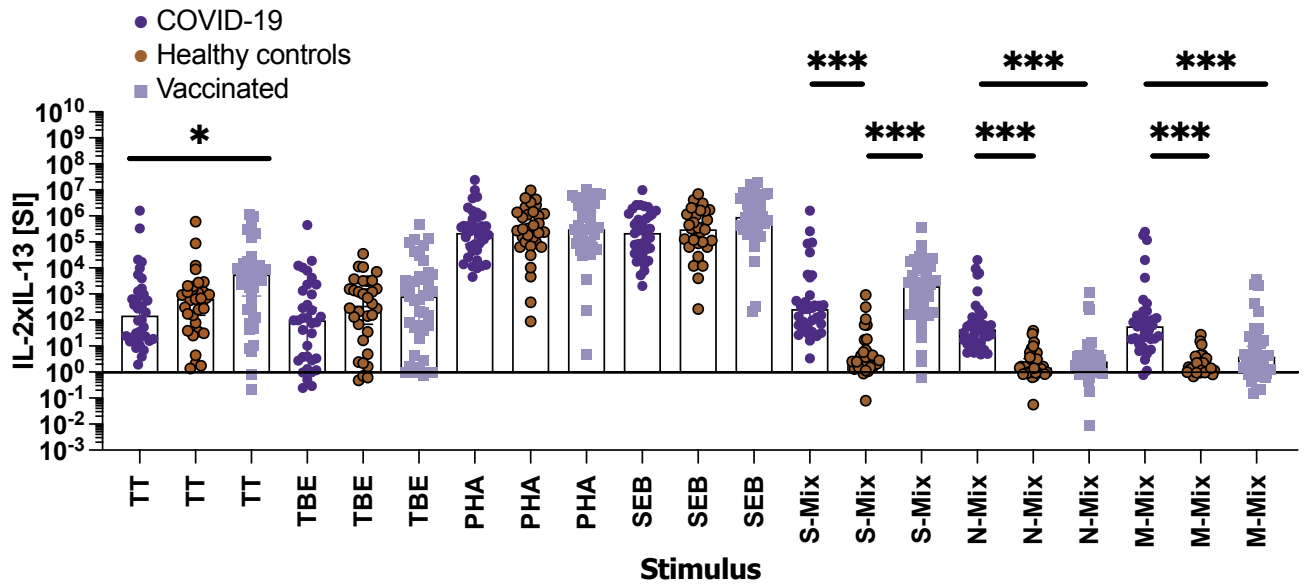

B

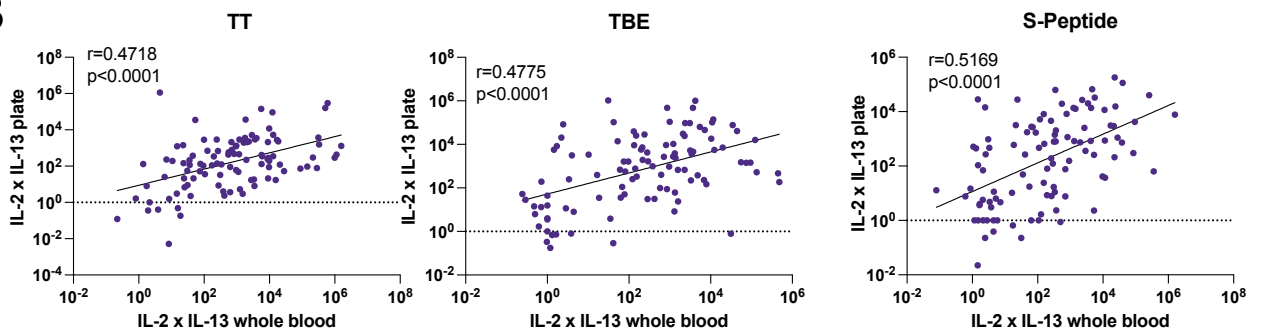

C

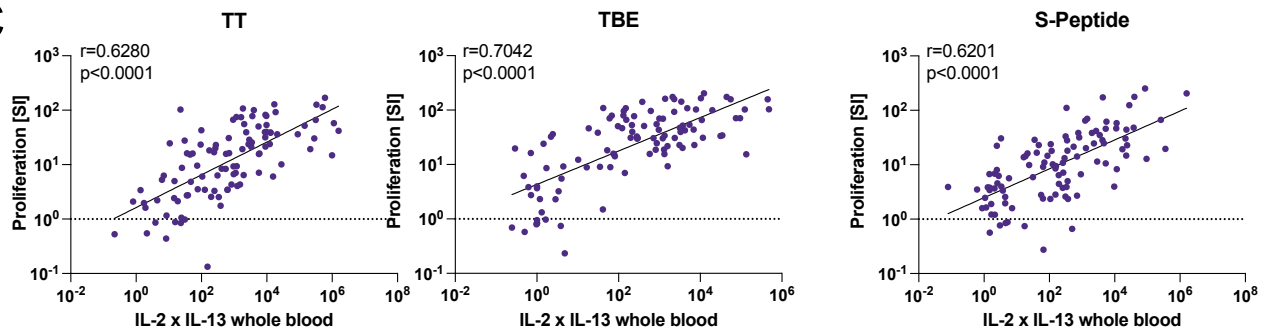

# Figure S10

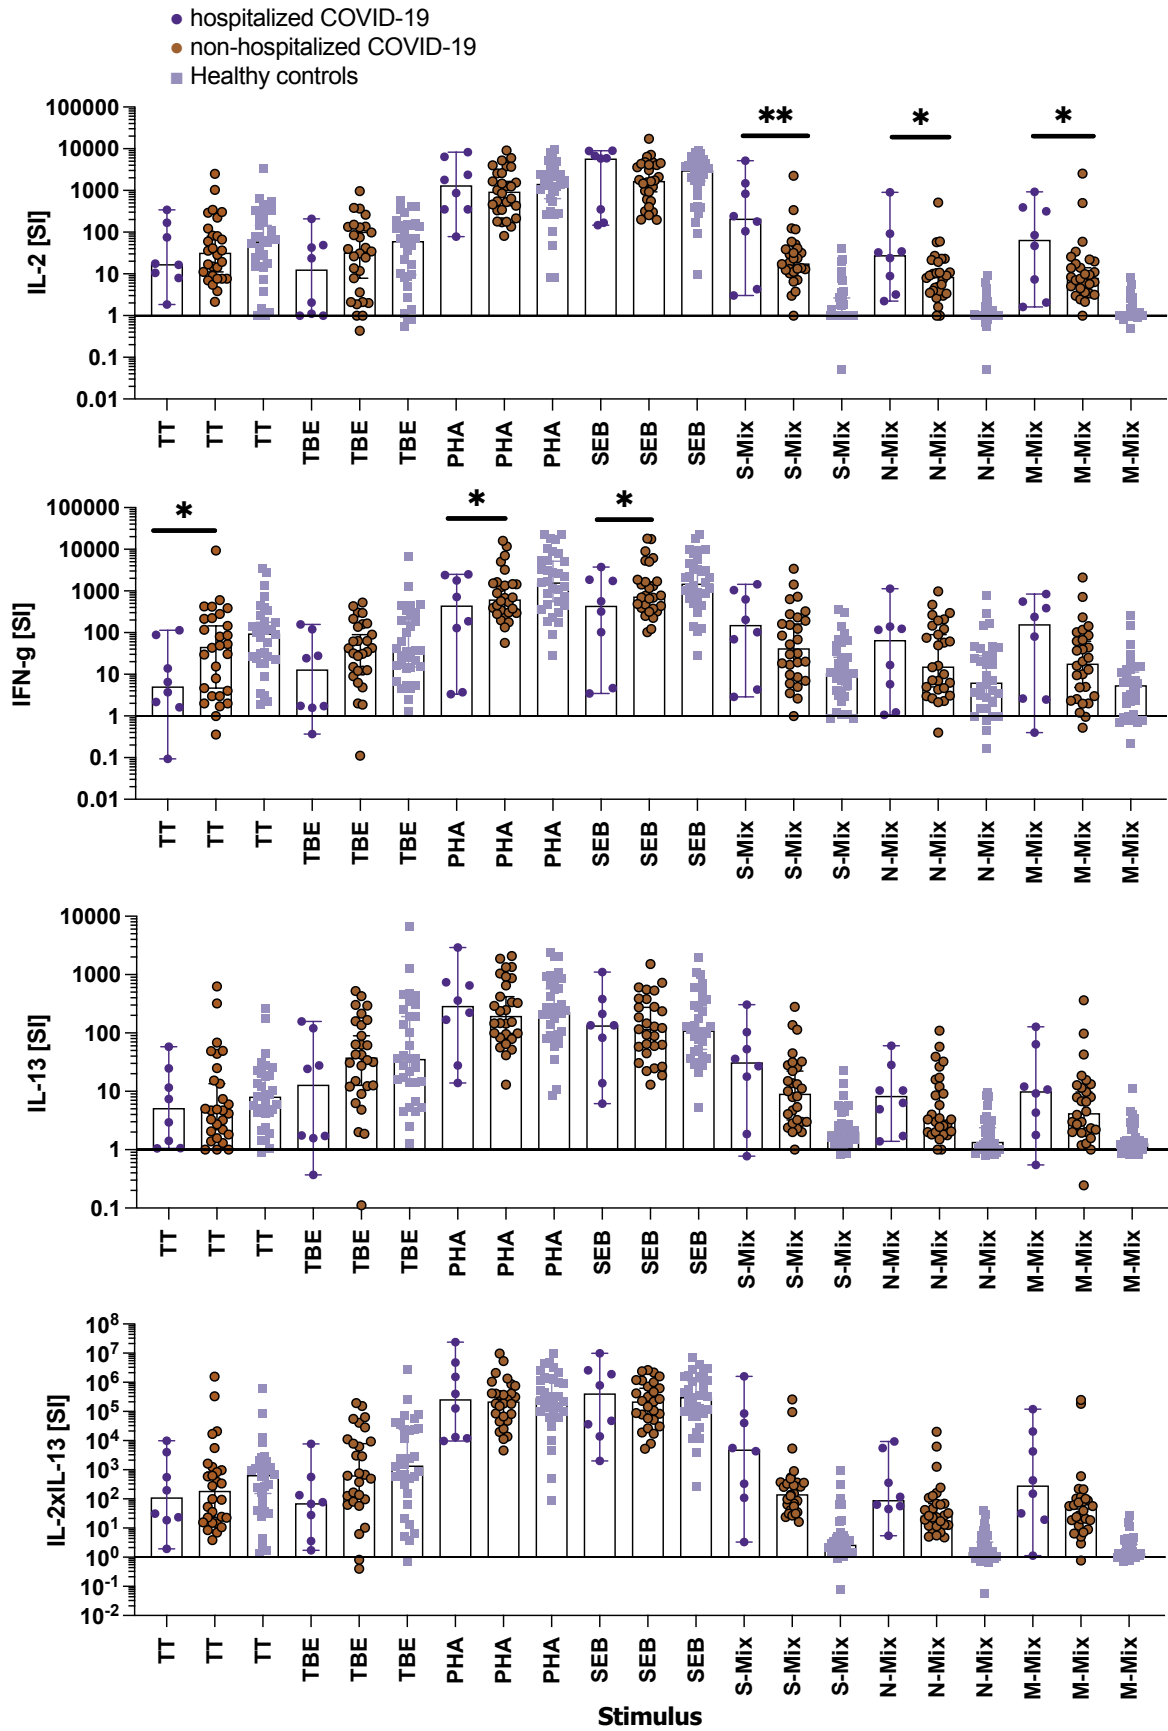

# Figure S11

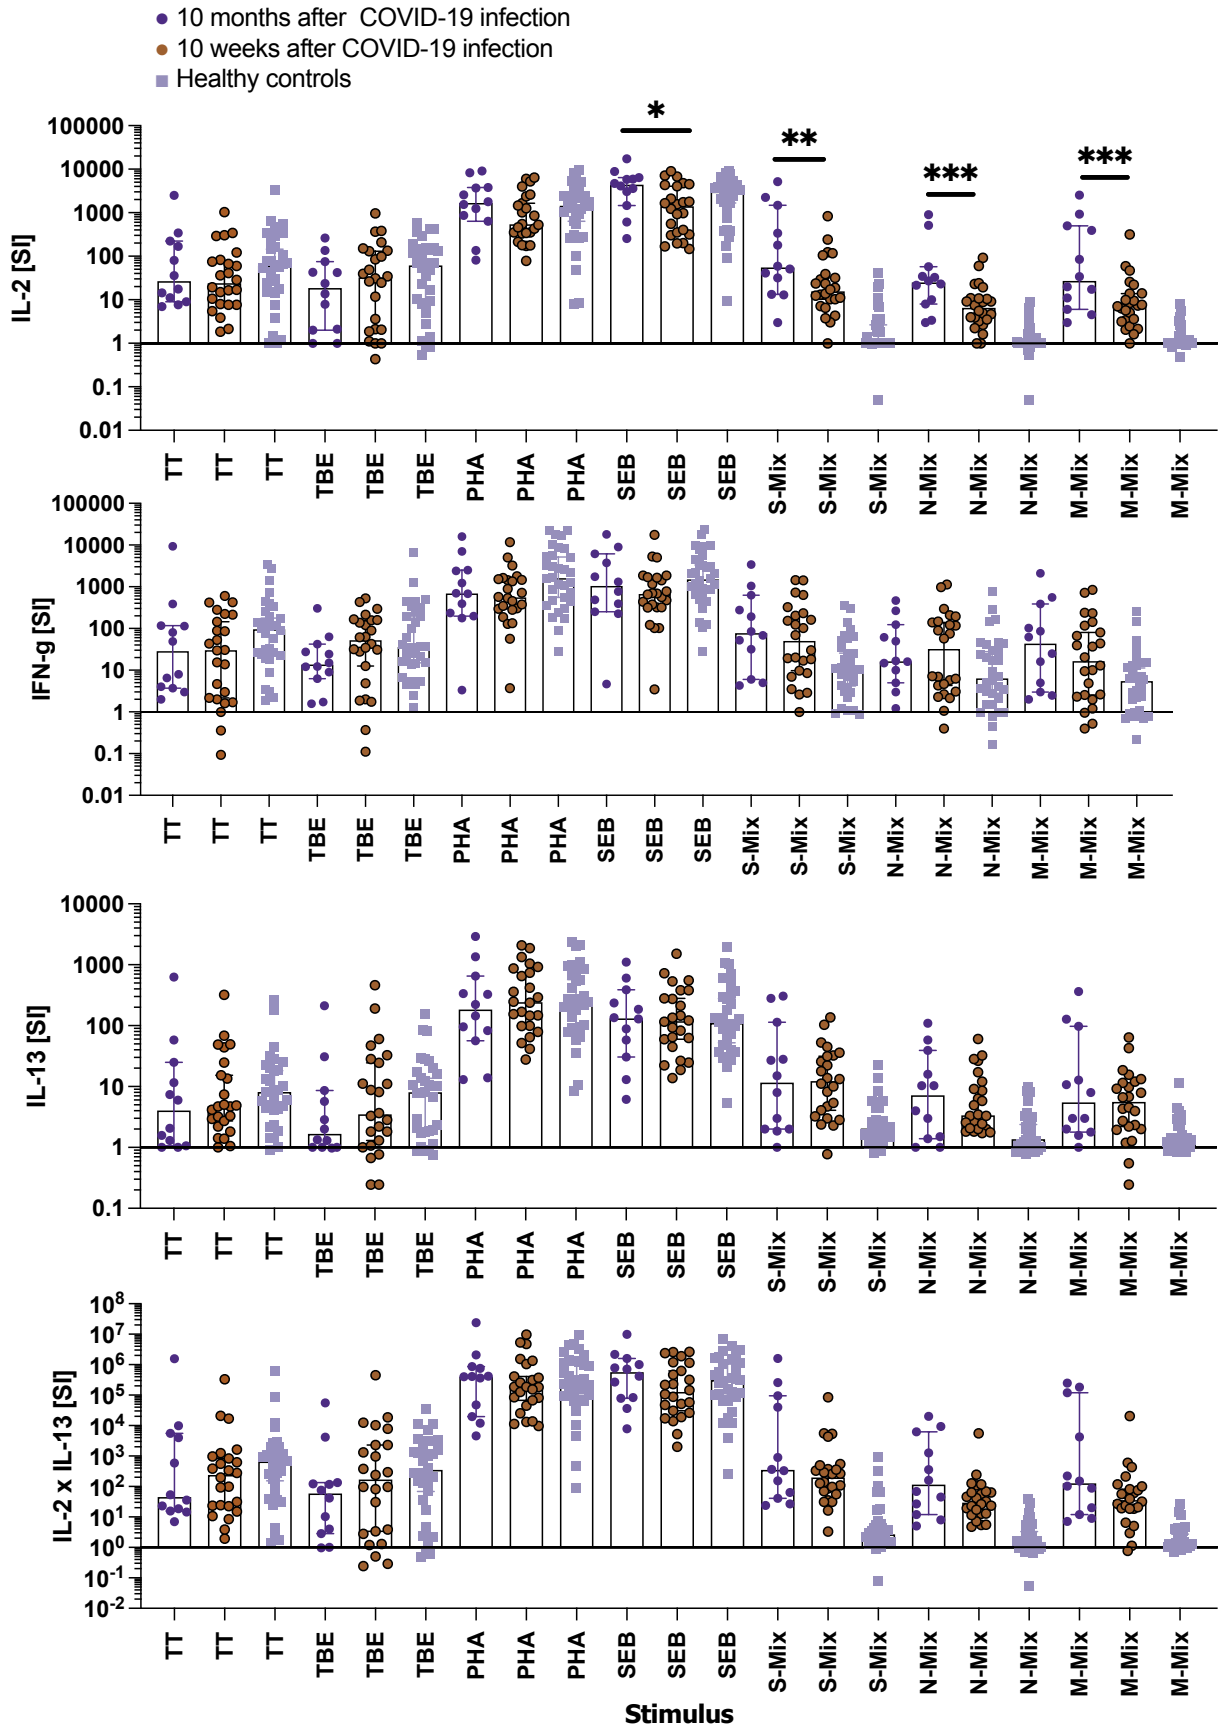

# Figure S12

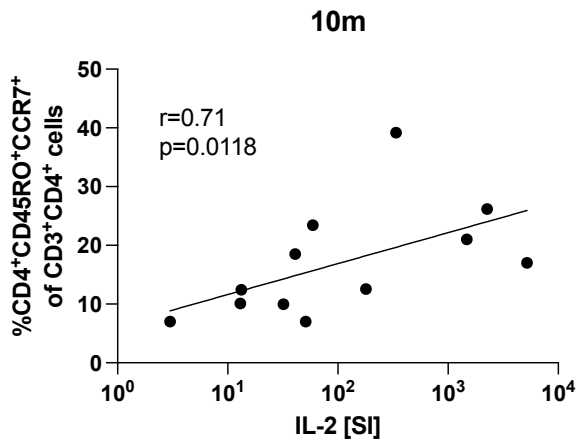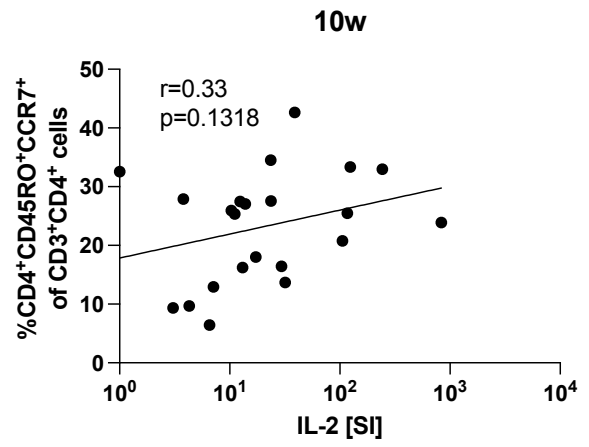

# Figure S13A

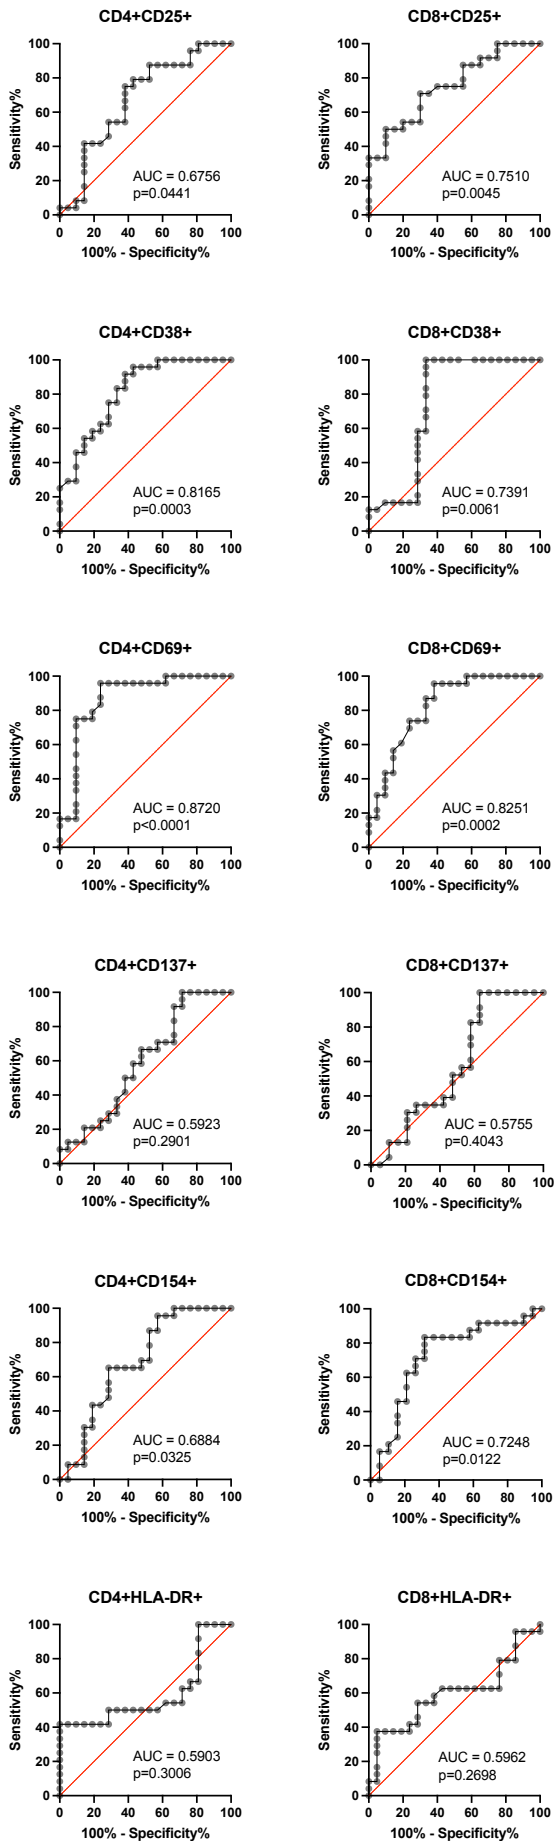

# Figure S13B

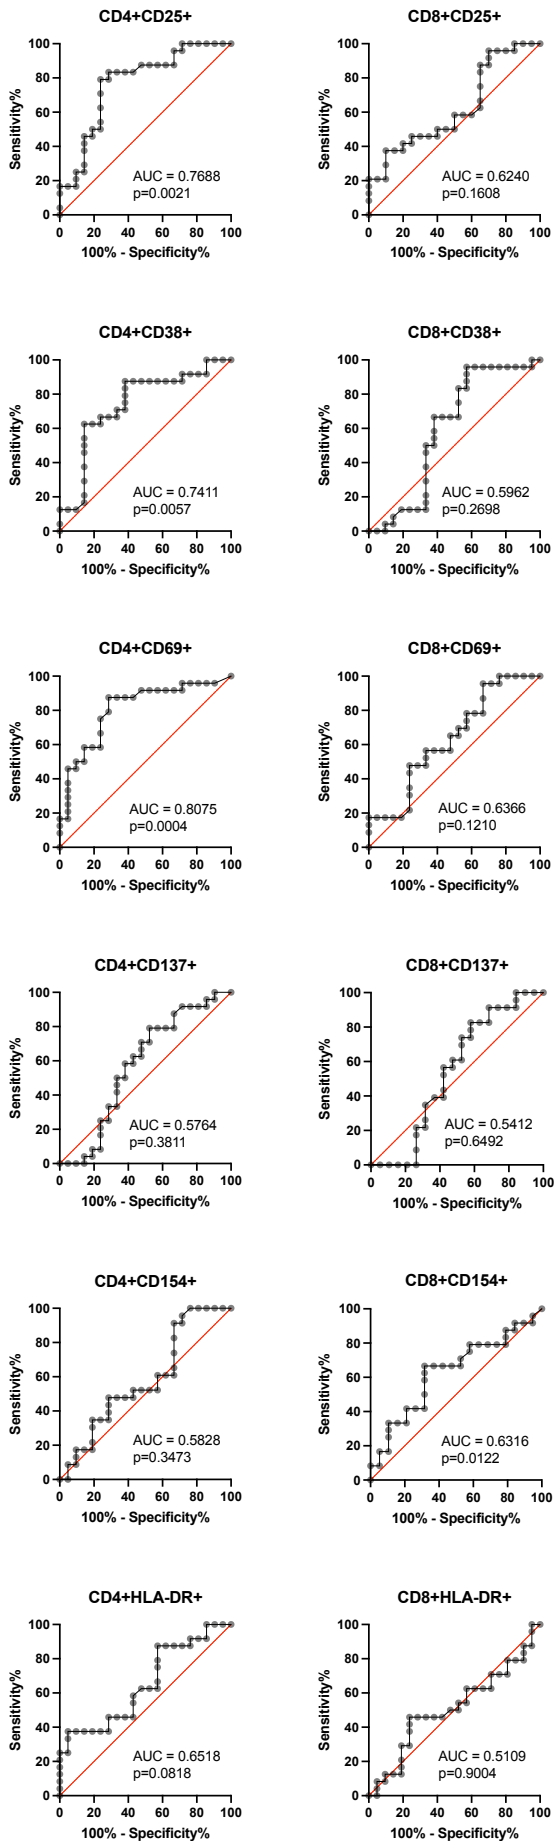



# Figure S13C

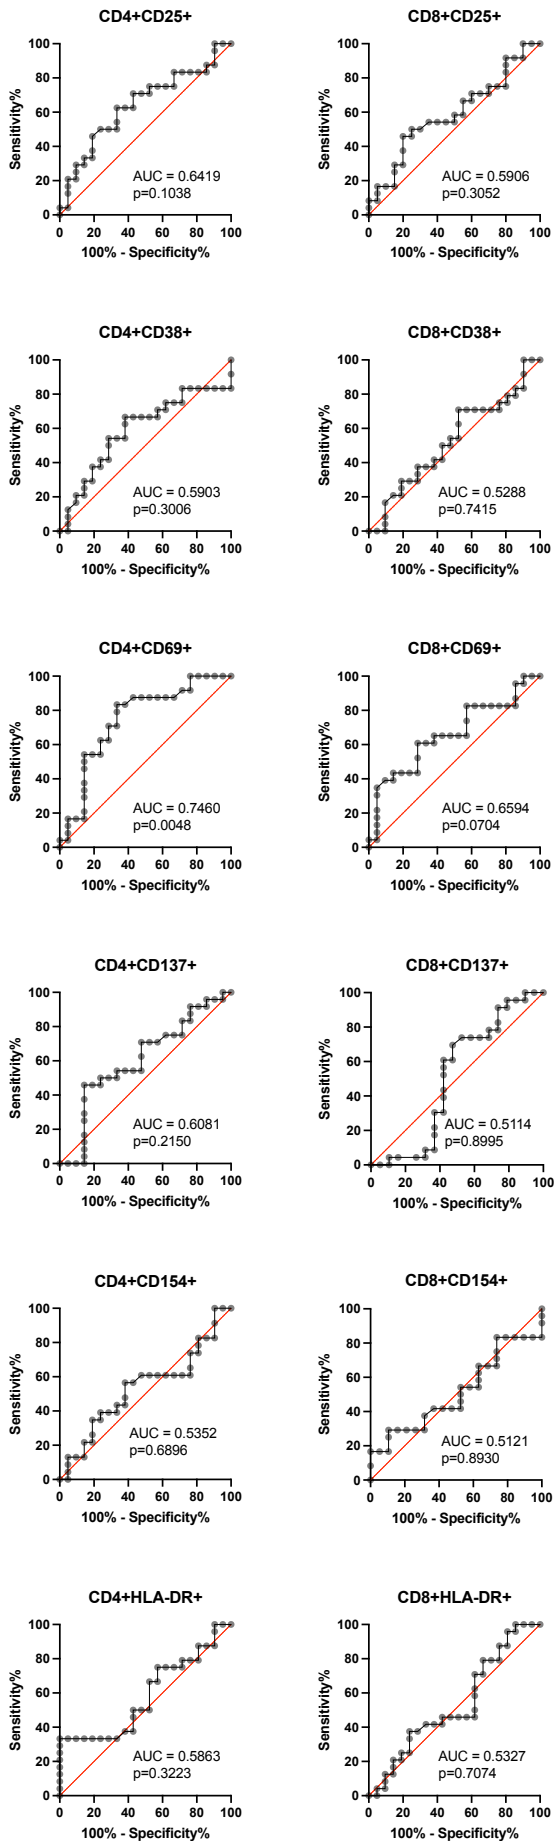

# Figure S14

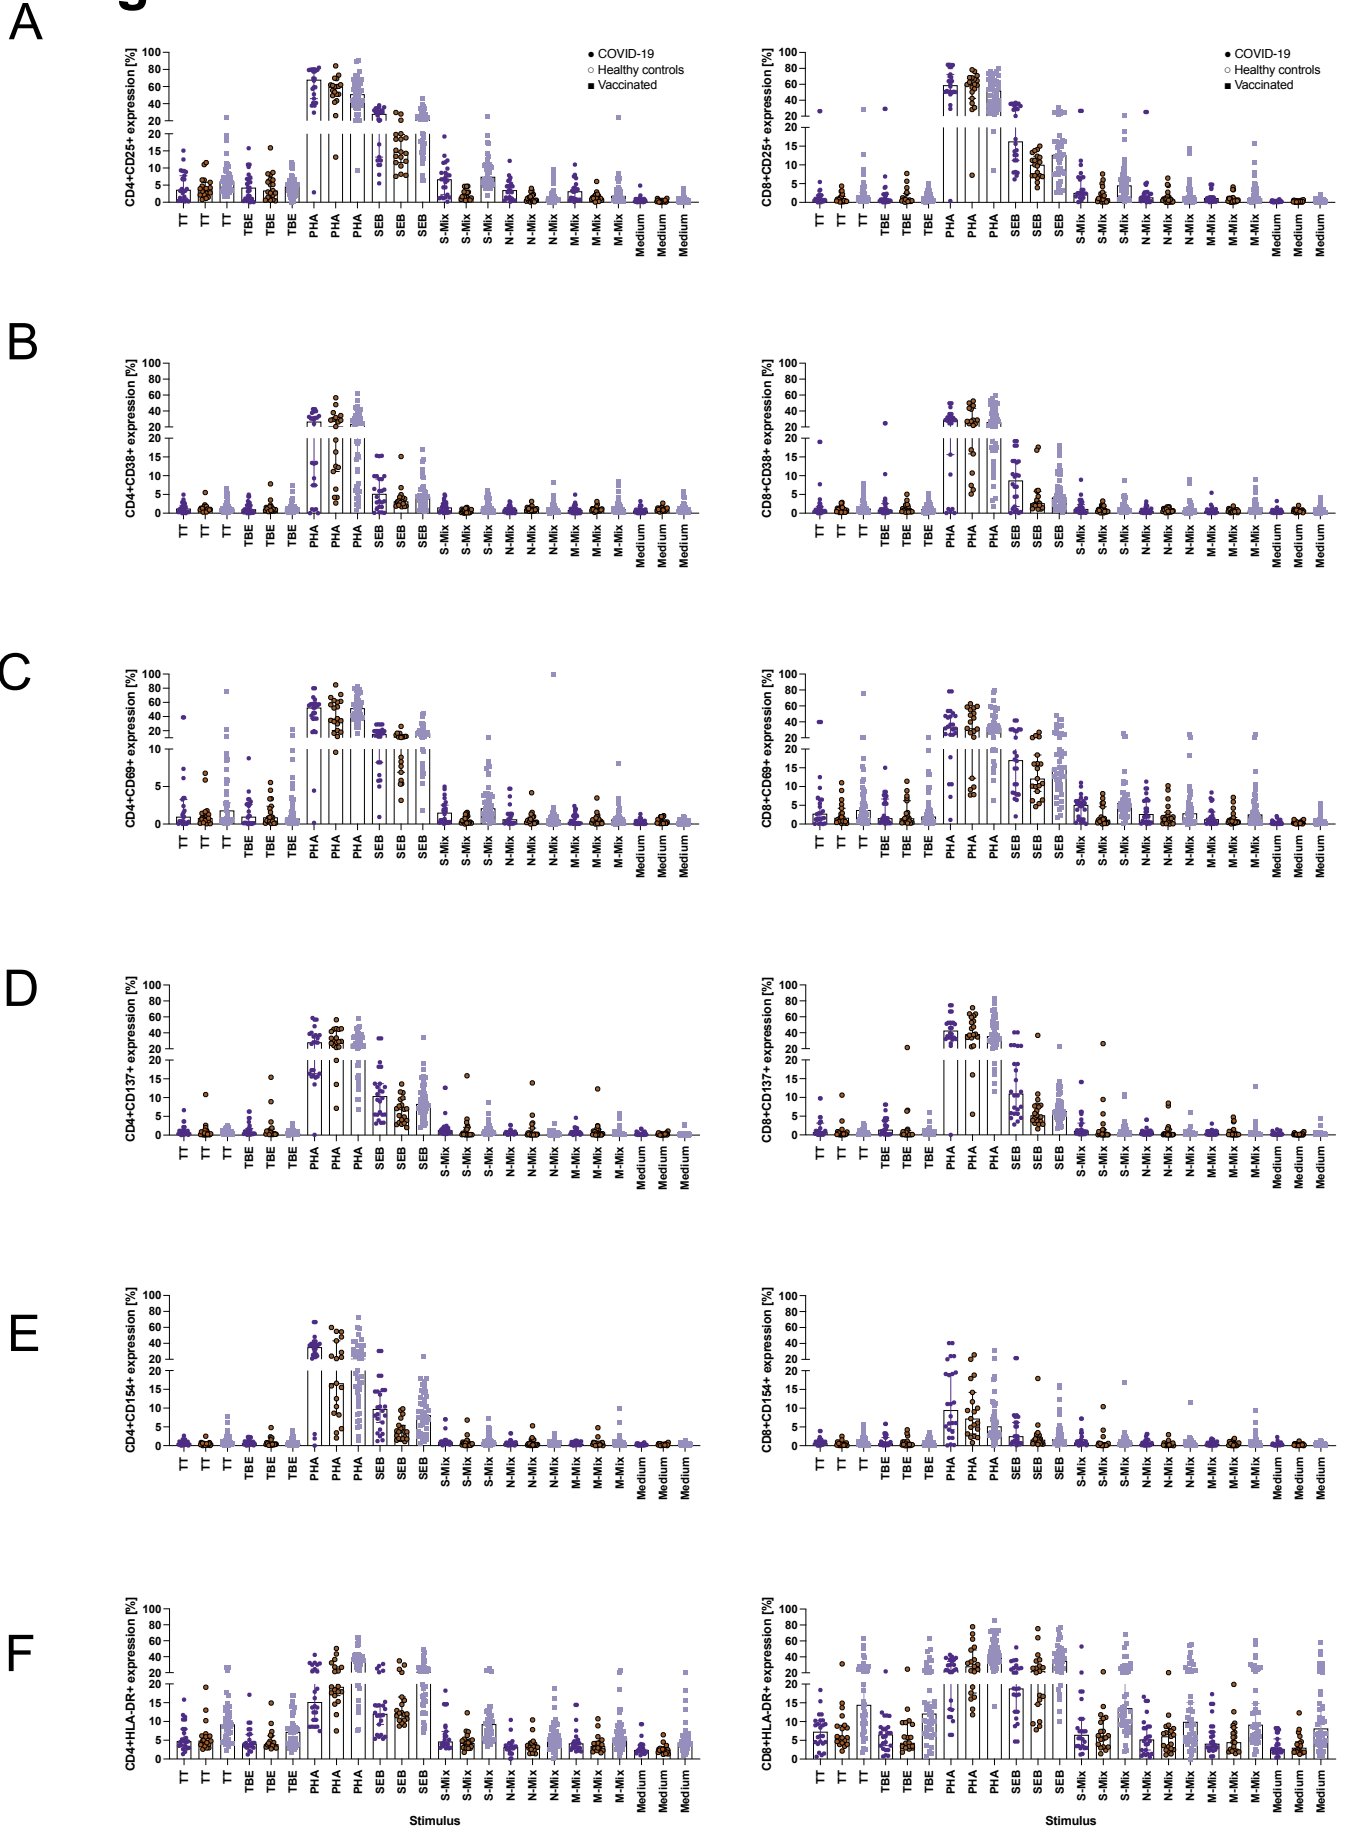

# Figure S15A

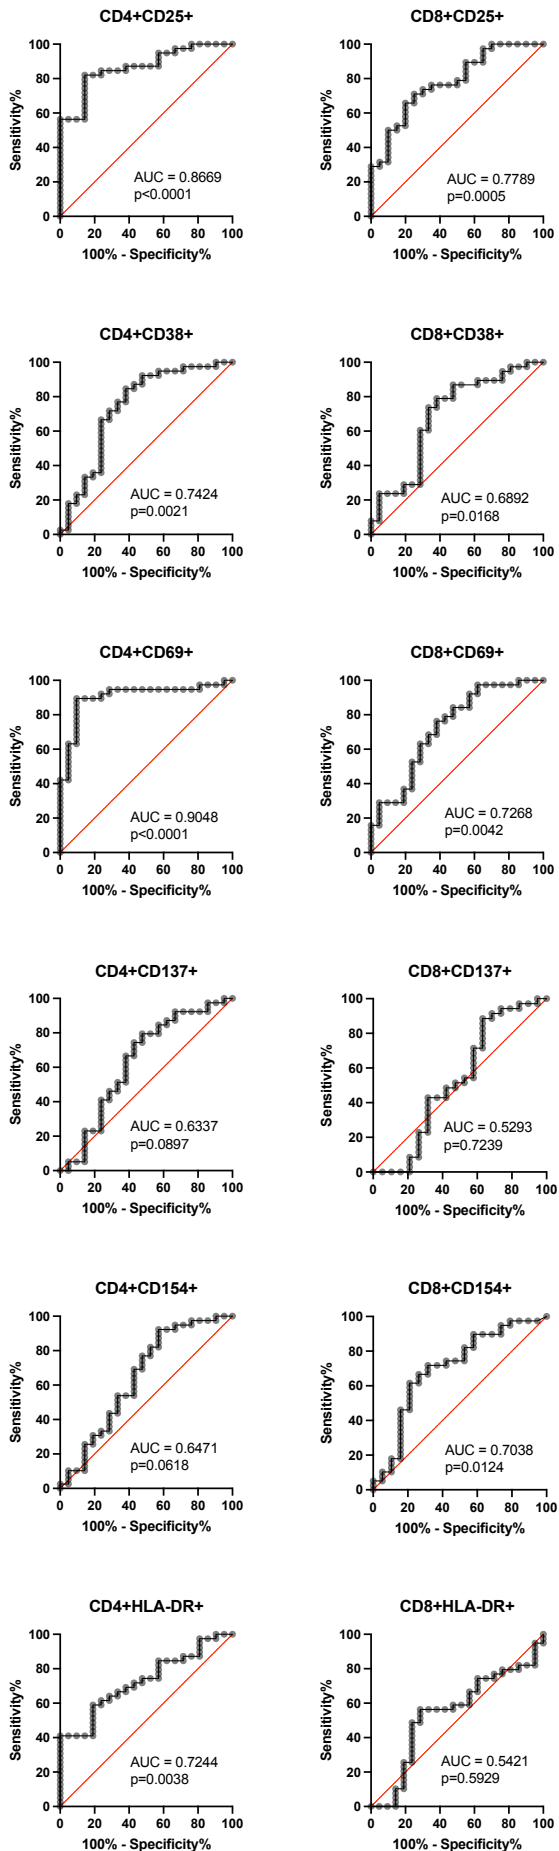

# Figure S15B

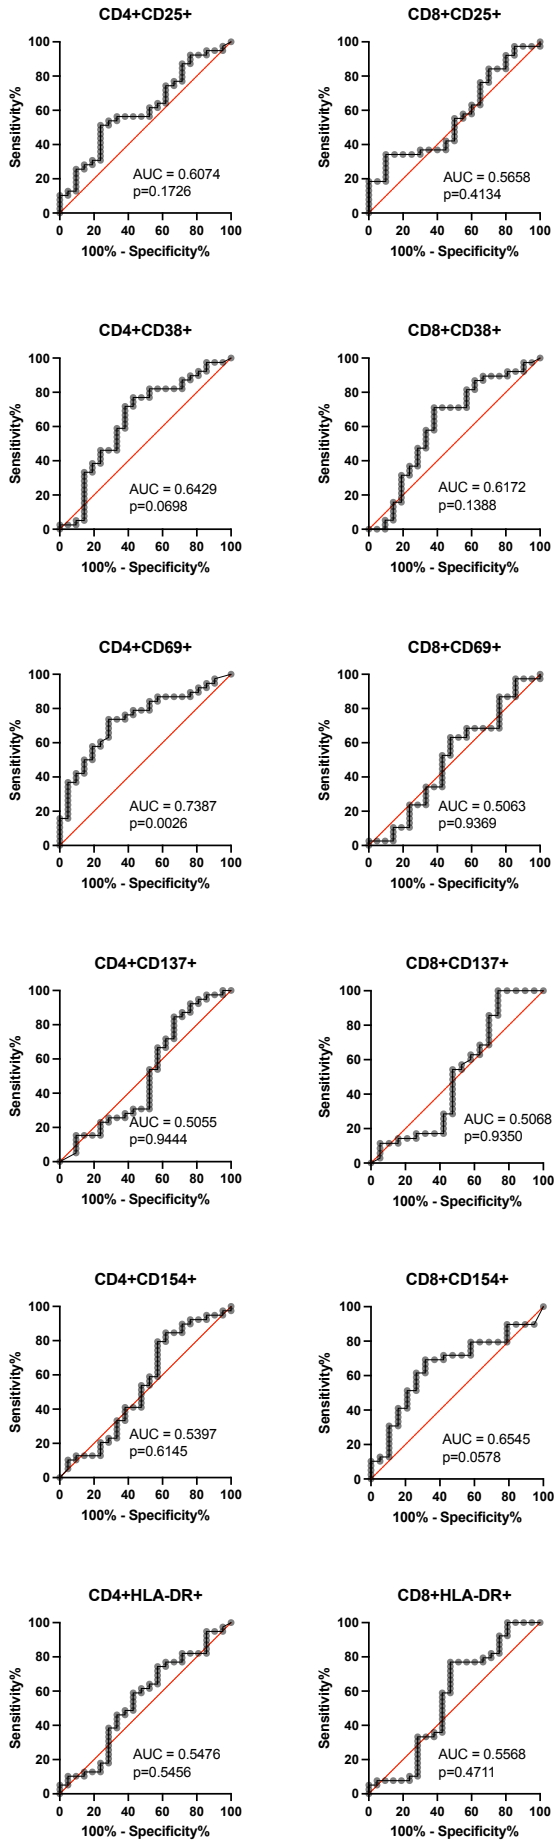

# Figure S15C

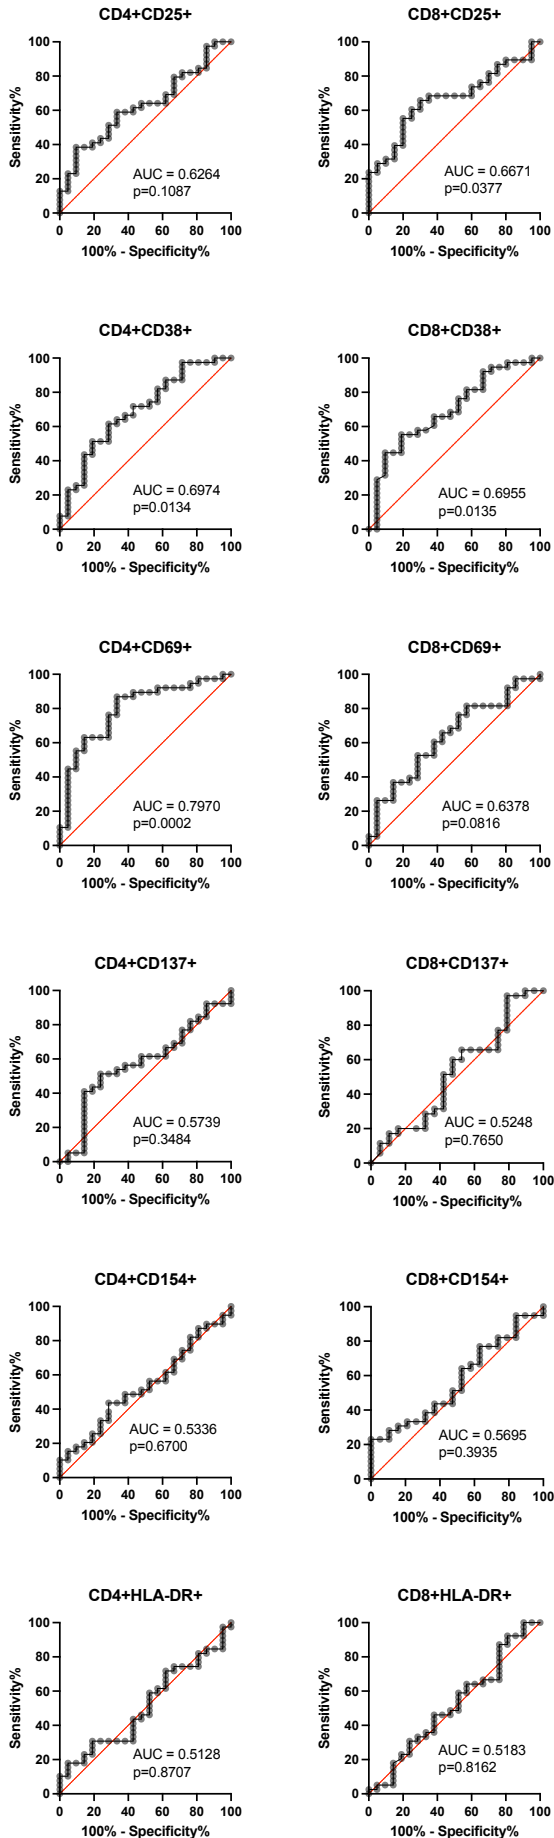

# Figure S16

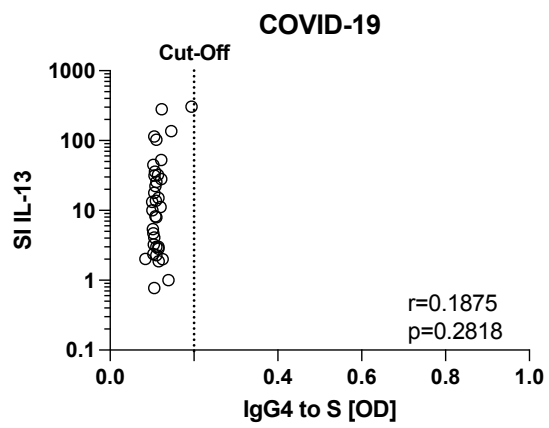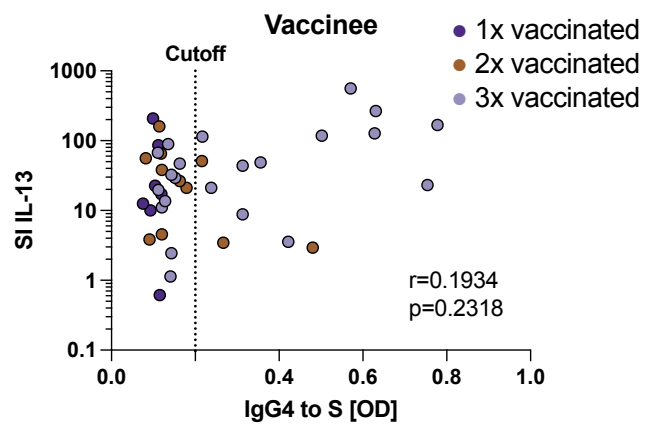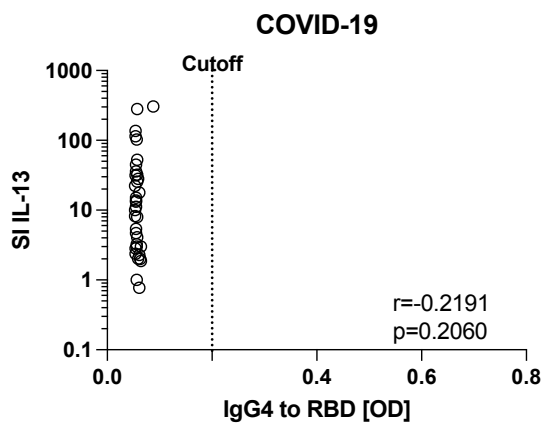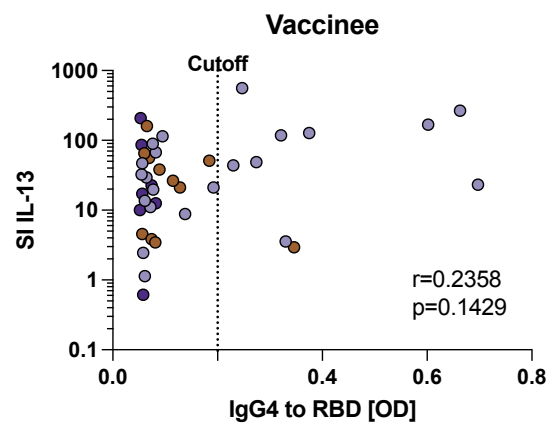

Supplement: ALL-9999-0-s001.pdf [file ALL-9999-0-s001.pdf]
